# Local mechanical stimuli shape tissue growth in vertebrate joint morphogenesis

Ester Comellas<sup>1,2,\*</sup>, Johanna E Farkas<sup>3</sup>, Giona Kleinberg<sup>4</sup>, Katlyn Lloyd<sup>4</sup>, Thomas Mueller<sup>4</sup>, Timothy J Duerr<sup>3</sup>, Jose J Muñoz<sup>5,6,7</sup>, James R Monaghan<sup>3,8</sup>, and Sandra J Shefelbine<sup>2,4,\*</sup>

<sup>1</sup>Serra Húnter Fellow, Department of Physics, Laboratori de Càlcul Numèric (LaCàN), Universitat Politècnica de Catalunya (UPC), Barcelona, Spain

<sup>2</sup>Department of Mechanical and Industrial Engineering, Northeastern University, Boston, United States

<sup>3</sup>Department of Biology, Northeastern University, Boston, United States

<sup>4</sup>Department of Bioengineering, Northeastern University, Boston, United States

<sup>5</sup>Department of Mathematics, Laboratori de Càlcul Numèric (LaCàN), Universitat Politècnica de Catalunya (UPC), Barcelona, Spain

<sup>6</sup>Centre Internacional de Mètodes Numèrics en Enginyeria (CIMNE), Barcelona, Spain

<sup>7</sup>Institut de Matemàtiques de la UPC-BarcelonaTech (IMTech), Barcelona, Spain

<sup>8</sup>Institute for Chemical Imaging of Living Systems, Northeastern University, Boston, United States

\* Authors for correspondance (ester.comellas@upc.edu, s.shefelbine@northeastern.edu)

## Abstract

The correct formation of synovial joints is essential for proper motion throughout life. Movement-induced forces are critical to creating correctly shaped joints, but it is unclear how cells sense and respond to these mechanical cues. To determine how mechanical stimuli drive joint morphogenesis, we combined experiments on regenerating axolotl forelimbs with a poroelastic model of bone rudiment growth. Animals either regrew forelimbs normally (control) or were injected with a TRPV4 agonist to impair chondrocyte mechanosensitivity during joint morphogenesis. We quantified growth and shape in regrown humeri from whole mount light sheet fluorescence images of the regenerated limbs. Results revealed statistically significant differences in morphology and cell proliferation between the two groups, indicating that mechanical stimuli play a role in the shaping of the joint. Local tissue growth in our finite element model was dictated by a biological contribution, proportional to chondrocyte density, and a mechanical one, driven by fluid pore pressure dynamics. Computational predictions agreed with experimental outcomes, suggesting that interstitial pressure might promote local tissue growth. Predictive computational models informed by experimental findings allow us to explore potential physical mechanisms and regulatory dynamics involved in tissue growth to advance our understanding of the mechanobiology of joint morphogenesis.

*Keywords:* synovial joint development; TRPV4; cartilage mechanosensitivity; poroelasticity; continuum growth; finite element model

## 36 1 Background

37 The shape of a synovial joint is critical to its functionality in movement and locomotion.  
38 Joint morphogenesis in the developing vertebrate limb bud follows a well-known sequence of  
39 events [1]. First, the mesenchymal cells forming the early limb bud differentiate into chondrocytes,  
40 except for those in the interzone, where the future joint will appear. Through a process known as  
41 cavitation, the skeletal rudiments are physically separated and the synovial cavity is formed. After  
42 cavitation, chondrocyte proliferation and matrix production in the rudiment result in growth and  
43 final joint shape. Movement-induced mechanical stimuli condition the correct formation of joints  
44 throughout this morphogenetic stage [2, 3]. Yet, how motion and biophysical forces influence joint  
45 shape is not fully understood to date [4, 5]. Insights into how chondrocytes proliferate and regulate  
46 joint shape in response to mechanical stimuli during morphogenesis has application in the study  
47 and treatment of joint deformities [5].

48 Animal studies using immobilised chicks [6–10], reduced-muscle and absent-muscle  
49 mice [11–13], and paralysed zebrafish larvae [14] have shown that reduced and restricted muscle  
50 contractions during embryonic development results in skeletal abnormalities, including alterations  
51 in joint shape. Elucidating the role of motion in joint development is challenging in animal models  
52 that develop in ovo or in utero [3]. An animal model that allows rigorous control of the biophysical  
53 environment during joint morphogenesis will further our understanding of how mechanical stimuli  
54 are linked to cell proliferation and tissue growth. Axolotl salamanders (*Ambystoma mexicanum*)  
55 regenerate limbs throughout life by recapitulating developmental processes. Regenerating axo-  
56 lotl limbs undergo stereotypical patterns of gene expression and cell differentiation that resemble  
57 mammalian joint development [15, 16]. Their limbs are morphologically similar to human limbs,  
58 with elbow joints comparable in cellular composition and skeletal structure to mammalian synovial  
59 joints [17, 18].

60 Joint morphogenesis in vertebrates is driven by the proliferation and subsequent hypertrophy  
61 of chondrocytes that form the bone rudiments. Chondrocytes respond to mechanical stimuli such  
62 as changes in osmotic pressure, cellular stretch, or fluid shear [19]. Ion channels, integrin sig-  
63 nalling, and the primary cilia are all known mechanosensors that initiate intracellular signalling  
64 cascades ultimately resulting in the transcription, translation, and/or molecular synthesis that  
65 leads to cartilage tissue growth [19–21]. In vitro studies have shown that the transient receptor  
66 potential vanilloid 4 (TRPV4) channel is possibly a key transducer of biophysical stimuli to reg-  
67 ulate cartilage extracellular matrix production [22–24]. TRPV4 activation in chondrocytes has  
68 been linked to osmolarity changes in in vitro studies [25, 26]. Recent studies have shown it also  
69 responds to physiologic levels of strain loading [27, 28], although there is also evidence to the  
70 contrary [29, 30].

71 To tease out the specific mechanical stimuli influencing joint shape, computational models can  
72 help decipher the role of biophysical stimuli in tissue growth and joint morphogenesis. Techniques  
73 like finite element analysis (FEA) are specially suited to studying the mechanics of morphogen-  
74 esis. They allow for the quantitative, unbiased testing of the biophysical mechanisms that might  
75 be regulating and controlling morphogenesis [31, 32]. A few studies have used FEA to examine  
76 how changes in mechanical loading affect joint morphogenesis [33–36]. These models demon-  
77 strated shape changes based on generic joint shapes and idealised loading conditions in two  
78 dimensions. The computational models assume that dynamic hydrostatic compression promotes  
79 cartilage growth, which is in line with experimental studies that have shown an increase in matrix  
80 production with cyclic compression [37–41]. Yet, these numerical studies use a static approxi-  
81 mation via linear elasticity. As such, they are unable to intrinsically capture the effects of dynamic  
82 loading on a poroelastic medium, including the fluid flow and pore pressure to which cells likely  
83 respond. To better comprehend how local mechanical stimuli drives the shaping of the joint, we  
84 incorporate a fluid component in our model to account for the dynamic changes in pressure and

85 velocity of extracellular fluid present in cartilage.

86 The goal of this study is to determine the effect of limb motion on joint morphology, and  
87 identify potential mechanisms by which mechanical loading is translated into chondrocyte prolifer-  
88 eration and unequal tissue growth that results in joint shape. Opening the TRPV4 channel in vivo  
89 in axolotls that were regrowing their forelimbs rendered the chondrocytes unable to sense and  
90 respond to changes in mechanical stimuli during the joint morphogenesis process [42, 43]. Then,  
91 using a technique for the three-dimensional visualisation of macromolecule synthesis [44] we  
92 quantified cell proliferation and joint shape for the mechanosensitively-impaired and the healthy  
93 joint formation cases. In this way we identified the effect of dynamic local mechanical stimuli on  
94 cell proliferation, tissue growth and joint morphogenesis. To test our hypothesis, we developed a  
95 three-dimensional biphasic poroelastic model in which growth of the solid component is driven by  
96 both morphogenetic factors and mechanical stimuli induced by dynamic local loading conditions.  
97 Experiments on regenerating axolotl forelimbs with and without the ability to respond to mech-  
98 anical cues show that local mechanical stimuli indeed promote chondrogenesis and determine  
99 joint morphology. Our poroelastic growth model of joint morphogenesis allows the exploration  
100 of the physical stimuli that contribute to tissue growth and, in this way, dictate the shape of the  
101 grown joint. Combining both, i.e. using experimental data to inform our computational model-  
102 ling and comparing predicted computational outcomes to observed experimental results, we can  
103 confidently begin to unravel the role of mechanics in vertebrate joint formation.

## 104 2 Axolotl experiments

105 To determine the effect of local mechanical stimuli on tissue growth during joint morphogenesis  
106 we restricted the ability of cells to respond to mechanical stimuli in regrowing axolotl forelimbs  
107 using the TRPV4 agonist GSK1016790A. Most known genetic dysfunctions of the TRPV4 channel  
108 resulting in skeletal dysplasias are related to a gain of function [45, 46]. The lack of regulation of  
109 intracellular calcium ions induced by the chemical activation of TRPV4 channels means that the  
110 chondrocytes lose their mechanosensitivity and are effectively unable to detect and respond to  
111 mechanical stimuli [42, 43].

112 We quantified the shape and growth of the fully-formed elbows through a detailed analysis of  
113 the humerus bone rudiments. Comparison of normally-regrown limbs (control group) with those  
114 that were mechanosensitively-impaired (GSK101 group) during the joint morphogenesis stage  
115 reveals statistically significant differences in bone rudiment shape and cell proliferation levels.

### 116 2.1 Experimental Methods

117 Larval animals (3-5 cm) were bilaterally amputated just proximal to the elbow joint. GSK1016790A  
118 was reconstituted in dimethyl sulfoxide (DMSO) and injected intraperitoneally at 50 µg/kg at 22  
119 days post amputation (dpa, n=6). Control animals (n=6) were injected with 50 µg/kg DMSO.  
120 Injections were repeated at 48-hour intervals. At 32 dpa, all animals were injected intraperitoneally  
121 with 5-Ethynyl-2'-deoxyuridine (EdU) and L-Azidohomoalanine (AHA). Limbs were collected 18  
122 hours later, fixed and stained.

123 We imaged nascent macromolecule synthesis in the regenerated forelimbs with light sheet  
124 fluorescence microscopy (LSFM) following the whole-mount click-it-based technique in Duerr et  
125 al. [44]. We selected EdU to visualise DNA synthesis, which allowed quantification of cell pro-  
126 liferation. AHA enabled visualising chondrocyte protein translation, i.e. most likely extracellular  
127 matrix, which provided a well-defined outline of the bone rudiment's perichondria. Quantification  
128 of 3D shape was then possible through the analysis of the humerus outline.

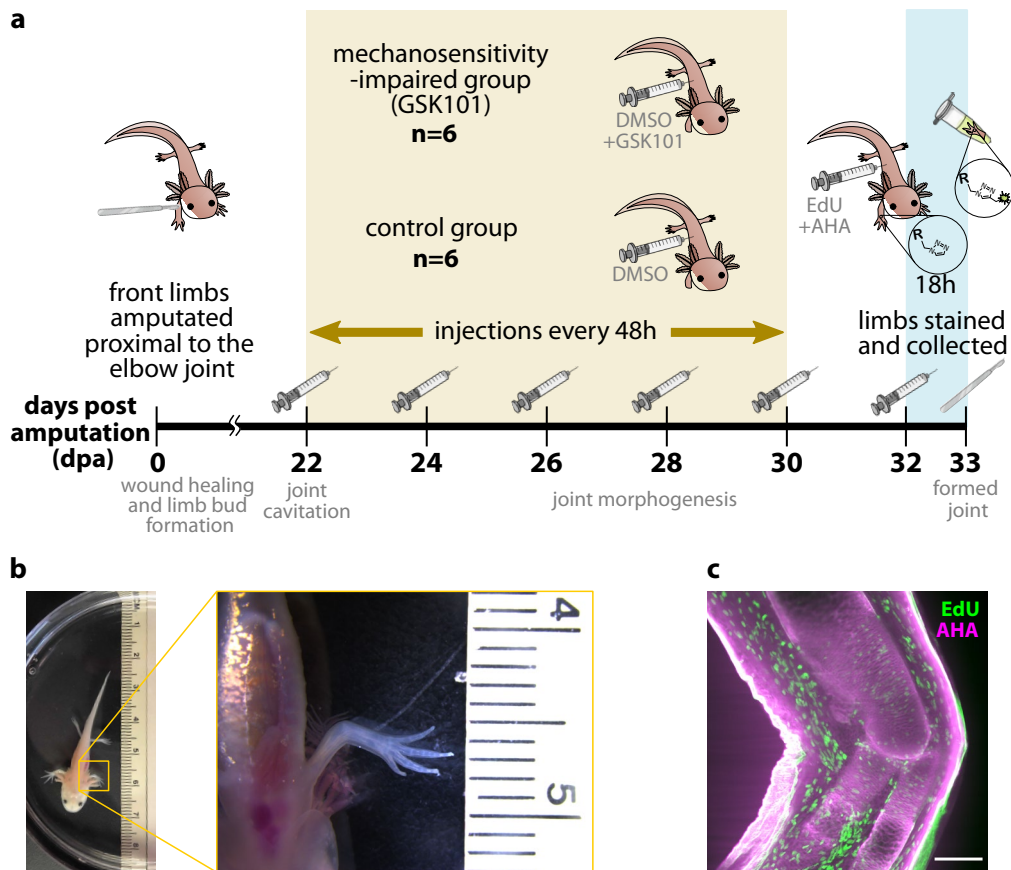

**Figure 1:** (a) Timeline of the experiments. Created with images from [BioRender.com](https://www.biorender.com) and [smart.servier.com](https://www.smart.servier.com). (b) Animals 3-5 cm in size were used, similar to the one shown here. Both the image of the whole animal as well as the close-up of a forelimb include a ruler in cm. (c) Axolotl forelimbs were imaged following the whole-mount click-it based visualisation technique in [44] to obtain an image stack of the regenerated elbow joint. A central slice of a 3D image stack is shown here. The scale bar length represents 300  $\mu\text{m}$ .

129 Figure 1a illustrates the timeline of the experiments and Figure 1b shows an example of the  
130 animal size used. Injections started at 22 dpa, which is roughly when joint cavitation occurs in  
131 regenerating limbs in 3-5-cm-sized animals, and continued throughout the joint morphogenesis  
132 stage of the joint formation process until 30 dpa. Figure 1c shows a central slice of a 3D image  
133 stack obtained for an exemplary control elbow. All images were acquired using a Zeiss light sheet  
134 Z.1 microscope paired with Zen software. In-plane pixel resolution of the image is 0.9154  $\mu\text{m}$  and  
135 slices are 4.9454  $\mu\text{m}$  apart. The file size containing both the EdU and AHA channels is about  
136 3 GB.

## 137 2.2 Data Analysis

138 Figure 2 outlines the light sheet image processing pipeline followed to analyse the shape of each  
139 humerus and count the proliferating cells within the bone rudiment. First, the 3D image stack  
140 was cropped and rotated to roughly orient the proximo-distal (P-D) axis of the humerus in the  
141 vertical direction (Figure 2a). The AHA channel was used to extract the bone rudiment shapes  
142 (Figure 2b) through segmentation of the humerus, radius, and ulna (Figure 2c). The data for the  
143 posterior alignment of the limb in 3D space was obtained (Figure 2d) from the humerus and ulna  
144 masks using the Fiji plugin BoneJ [47].

145 To systematically analyse the humerus shape, we first aligned the segmented bone rudiment

146 surfaces to a standard orientation (Figure 2e). The alignment process included mirroring of right  
147 limbs so that all limbs had the medial and lateral epicondyles in the same relative position in  
148 space. We fitted a cylinder to the humerus surface and placed a hemisphere on top. This refer-  
149 ence surface was then shifted vertically upwards until it was tangent to the distal end of the  
150 humerus surface (Figure 2f, left). The perpendicular distance from the reference surface to the  
151 humerus surface was mapped onto the reference surface. Both the mapped distance and the  
152 reference surface dimensions were normalized with the fitted cylinder diameter to account for  
153 animals of different size (Figure 2f, centre). We flattened out the mapped values (unwrapping the  
154 cylinder and hemisphere) to obtain a 2D standardised humerus surface representation, where  
155 red indicates a protuberance (the epicondyles) and blue shows the concavities of the original 3D  
156 surface (Figure 2f, right). Next, we computed a contour map from the 2D surface map (Figure 2g,  
157 left) and extracted the data within the closed contours of 0.2 (Figure 2g, right), which correspond  
158 to the normalized humerus epicondyles. Finally, we quantified their shape through computation  
159 of the normalized area and normalized volume within the extracted contours (Figure 2h). Once all  
160 limbs had been processed, we aligned the 2D surface maps based on the position of the medial  
161 epicondyle centroids. Then, we computed a mean 2D surface map of the control and GSK101  
162 groups. These allowed reconstructing a mean 3D humerus surface for each group.

163 Proliferating cells were quantified by analysing the EdU channel (Figure 2i). We manually  
164 generated a small training set to train the deep learning algorithm Stardist3D [48], which was  
165 used to identify the stained cell nuclei in the 3D image stack. Memory limitations in Stardist3D  
166 required splitting the original image stack into smaller substacks for processing (Figure 2j). The  
167 Fiji plugin 3D Objects Counter [49] was used on the cell nuclei masks produced by Stardist3D  
168 to identify proliferating cell positions and volumes. The data was then regrouped and the whole  
169 set was masked with the humerus bone outline obtained in Figure 2c. The data from Figure 2d  
170 was used to align the cell nuclei in 3D space (Figure 2k, left). Outliers were removed based on  
171 cell volume and we used a fixed-length cut-off to ensure quantification of cell proliferation was  
172 performed in an equivalent humerus volume across different limbs (Figure 2k, right).

---

**Figure 2 (following page):** Workflow of the experimental data analysis using an exemplary control limb. (a) Each 3D image stack was cropped around the elbow joint and rotated to vertically align the proximo-distal (P-D) axis of the humerus. (b) The AHA staining in (a) allowed for segmentation of the bone rudiments, producing (c) the masks of the radius, ulna and humerus. (d) The Fiji plugin BoneJ provided data for limb alignment, based on the principal axes of the humerus and ulna bone rudiments. The minimum principal axis computed by BoneJ corresponded with the proximo-distal longitudinal axis of the bone rudiment. (e) Using data from (d), the surfaces in (c) were aligned in 3D space using Matlab. (f) The aligned humerus from (e) was mapped onto a reference surface and normalized with the fitted cylinder diameter to create a 2D representation of the humerus' 3D surface. (g) The representation of the lateral and medial epicondyles were extracted and (h) systematically quantified for each limb. (i) The EdU staining in (a) was used to identify the proliferating cell nuclei within the humerus bone rudiment. (j) Stardist was trained with a custom-made dataset. Substacks of the original 3D image were fed to the algorithm, which provided the corresponding cell nuclei segmentations. (k) Substacks of cell nuclei segmentations were re-grouped, nuclei within the humerus were extracted using the corresponding mask from (c) and aligned in space using data from (d). After removal of outliers, the position of each nucleus' centre of mass and volume was plotted in 3D space. Total number of cells were counted within an equal volume among all humeri.

## Initial data

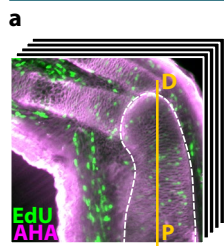

rotated and cropped stack

## Part 1: bone rudiment segmentation and alignment data

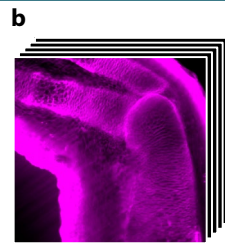

extract organ-level data from AHA channel

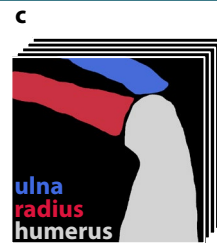

masked bone rudiments

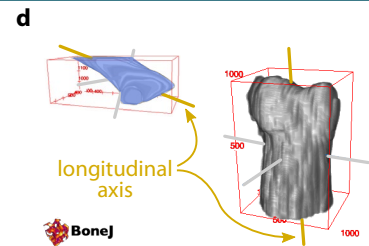

3D limb alignment data

## Part 2: humerus 3D shape analysis

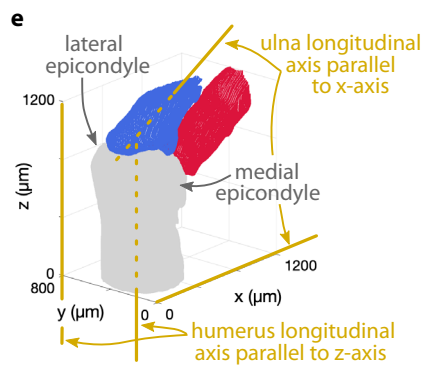

align limbs, including mirroring of right limbs

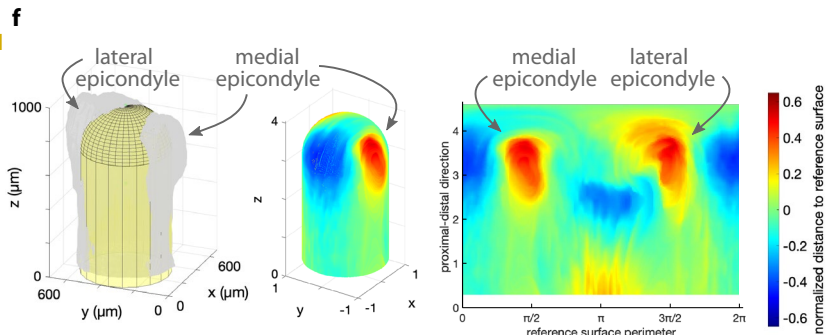

create a standardized humerus surface representation: fit a cylinder to the humerus shaft and add a hemispherical cap on top; map the distance to the humerus surface onto this reference surface and normalize the mapping; flatten out the surface map

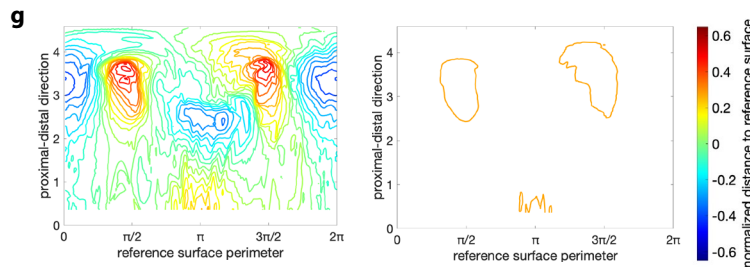

extract epicondyle data: compute contour map; extract information contained within closed contours of 0.2

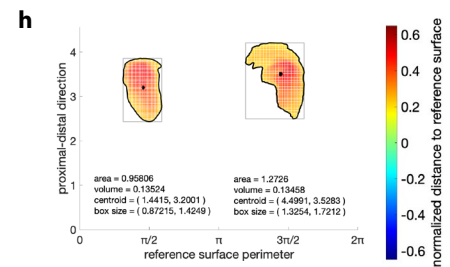

quantify epicondyle shapes: normalized areas and volumes

## Part 3: humerus 3D proliferating cell count

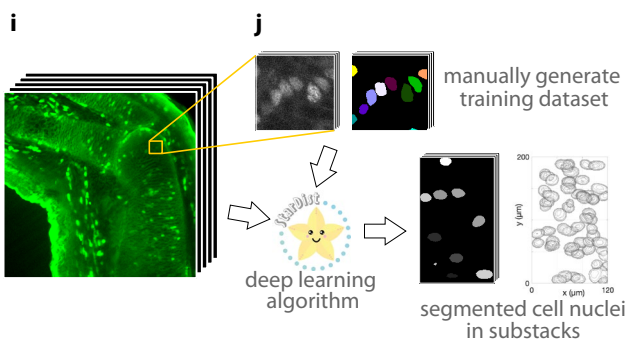

extract cell-level data from EdU channel

segment stained cell nuclei in substacks of original image

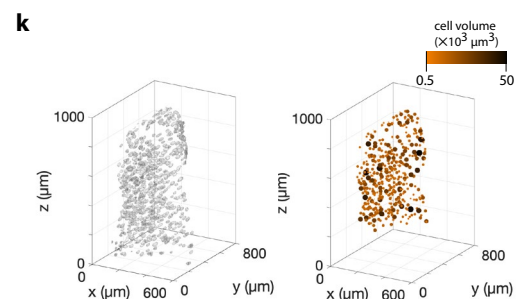

quantify cell proliferation: regroup substacks, mask detected cells within humerus and align using data from Part 1; remove outliers based on cell volume and use a fixed-length cut-off

173 To quantify shape and growth differences between the control and GSK101-treated limbs we  
174 focused on the following measurements: (i) the total count of EdU-positive cell nuclei (Figure 2k,  
175 right); (ii) the diameter of the cylinder fitted to each humerus shaft used in the generation of the  
176 reference surface (Figure 2f, left); and (iii) normalized volume and area of both the lateral and  
177 medial epicondyles (Figure 2h). We grouped all limb results for each measurement and ran a  
178 Shapiro-Wilk normality test. Except for the proliferating cell count, all other data measurements  
179 were normally distributed. We then performed a one-way ANOVA to check for statistically signi-  
180 ficant differences between the control and GSK101 experimental groups of normally-distributed  
181 data. The proliferating cell count p-value was obtained using a Kruskal-Wallis test.

182 The workflow was implemented using a combination of Fiji [50], the ZeroCostDL4Mic imple-  
183 mentation of Startdist3D [51] and a customised code in Matlab [52]. A detailed description of the  
184 process and the scripts created to implement it are provided as Supplementary Material.

## 185 2.3 Experimental Results

186 Figure 3a provides the results of the statistical analysis on the measures obtained following the  
187 data processing pipeline summarized in Figure 2. Our results show significant differences in  
188 growth and shape between the humeri of the control group and the mechanosensitively-impaired  
189 (GSK101) group. The mean value of the proliferating cell count in the control group is fourfold that  
190 of the GSK101 group ( $p\text{-value} < 0.001$ ). A central slice of each EdU-stained humeri is provided  
191 in Figure 3b. The cell nuclei identified in two representative humeri of each group are plotted in  
192 3D (Figure 3c), showing the striking difference in chondrocyte proliferation between the control  
193 and GSK101 groups. However, as shown in Figure 3a, the diameter of the cylinders fitted to the  
194 humeri shaft is similar for the two groups. Regarding humeri shape, the normalized volumes of  
195 both medial and lateral epicondyles are larger for the control group than the GSK101 group ( $p\text{-}$   
196  $\text{value} = 0.005$  and  $< 0.001$ , respectively). The normalized areas of the lateral epicondyles in the  
197 control group are also larger ( $p\text{-value} < 0.001$ ), while no significant difference was found for the  
198 normalized areas of the medial epicondyles. Figure 3d provides a visual representation of these  
199 differences through the reconstruction of a mean humerus surface for the control and GSK101  
200 groups. Individual 2D surface maps of each limb are provided in Appendix A.2. The mean hu-  
201 merus 3D surfaces, reconstructed from the 2D maps, are overlaid for comparison (Figure 3e).

---

**Figure 3 (following page):** Processed experimental results. (a) Results of the statistical analysis on the data points obtained following the methodology outlined in Figure 2. All data was normally distributed (Shapiro-Wilk test), except for the proliferating cell number. We performed a Kruskal-Wallis test for the latter, and a one-way ANOVA for all other measures to obtain the p-values. (b) EdU-stained masked humeri. The maximum intensity projection of 20 central slices in each humerus is shown. All images have the same 200  $\mu\text{m}$  scale bar (top right). The two control humeri marked with a red cross were excluded from the 3D shape analysis because they were too short to be aligned with the methodology summarized in Figure 2. (c) The 3D cell nuclei positions for a representative humerus of each group (marked with an asterisk in b) are shown. (d) Mean 2D surface maps for the control and GSK101 groups. The corresponding mean normalized humerus surface (in grey) is recovered for both groups. (e) The mean humerus surface for the control and GSK101 groups are aligned for comparison. A diameter of 450  $\mu\text{m}$  is used for both.

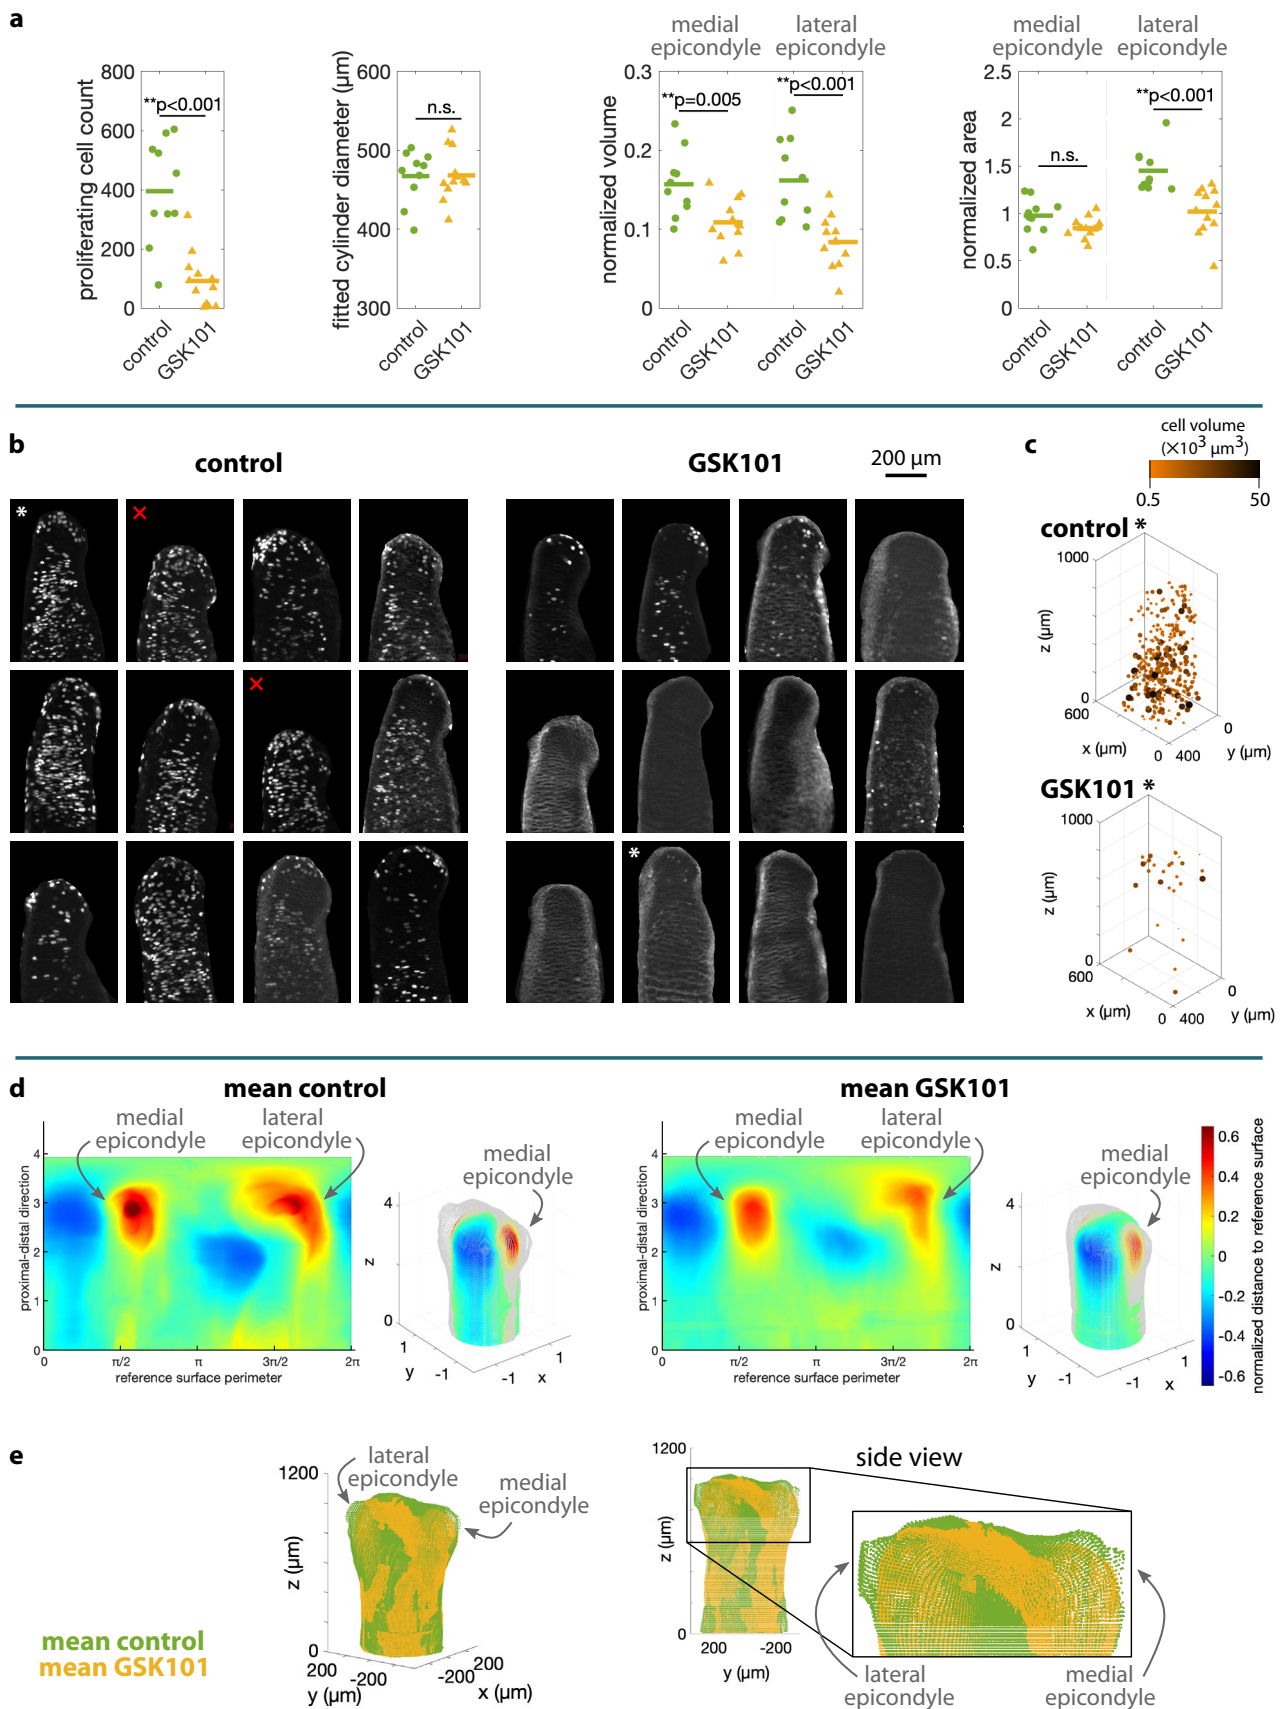



## 202 **3 Computational modelling**

203 We created an experimentally-informed finite element model of a developing humerus with the  
204 aim of exploring potential movement-induced mechanical stimuli as drivers of tissue growth. The  
205 humerus tissue was modeled as a biphasic poroelastic material, where growth of the solid com-  
206 ponent was hypothesized to be driven by a biological component and a local dynamic mech-  
207 anical stimulus. A growth model based on local changes in fluid pressure induced by an elbow  
208 flexion-extension loading cycle predicted a final humerus morphology that resembled our ex-  
209 perimental observations of the control group. When the mechanically-driven growth component  
210 was removed, shape prediction was in accordance with the experimental observations of the  
211 mechanosensitively-impaired GSK101 group.

### 212 **3.1 Poroelastic framework with continuum growth**

213 Cartilage tissue has a water content of roughly 80% by volume of tissue mass [53]. The mechan-  
214 ism for transduction of mechanical forces in tissues is not completely understood, but fluid flow  
215 is known to play an important role [19]. Poroelastic theory is commonly used in finite element  
216 models of cartilage response to loading [54–57] because it can explicitly capture the fluid flow  
217 effects.

218 The biphasic approach defines tissue as a mixture of an elastic solid skeleton with free-flowing  
219 fluid circulating within its pores. In cartilage, the fluid can be assimilated to the interstitial fluid in  
220 the tissue, i.e. water and dissolved ions, growth factors and other molecular components. The  
221 solid component represents the proteoglycans and collagen of the extracellular matrix (ECM) and  
222 chondrocytes. Chondrocyte proliferation and ECM production in cartilage can then be modeled  
223 through continuum growth of this solid phase. To our best of knowledge, this is the first compu-  
224 tational model of cartilage tissue growth using biphasic theory. Unlike previous models of joint  
225 morphogenesis [33–36], the effect of fluid flow is explicitly incorporated in our simulations, allow-  
226 ing us to better test our hypothesis that local dynamic mechanical stimuli are the drivers of tissue  
227 growth, and ultimately determine joint shape.

### 228 **3.2 Numerical framework for poroelasticity**

229 The biphasic nature of cartilage tissue is modeled using poroelastic theory. The deformation of  
230 the solid component is characterized by its displacements  $\mathbf{u}_S$  while the fluid behaviour is defined  
231 by the pore pressure  $p$ . The governing equations required to solve the problem for the two un-  
232 knowns,  $\mathbf{u}_S$  and  $p$ , are the linear momentum and mass balance equations. These introduce the  
233 constitutive equations of the solid and fluid components, respectively. The solid behaviour is char-  
234 acterized by the Kirchhoff stress tensor  $\boldsymbol{\tau}$  while the fluid flow is defined by the seepage velocity  
235  $\mathbf{w}$ , which is the relative velocity of the fluid with respect to the deforming solid. For simplicity,  
236 we considered a neo-Hookean hyperelastic model for the solid part and a Darcy-like law for the  
237 fluid one. An overview of the mathematical details of the poroelastic formulation is provided in  
238 Appendix B.

### 239 **3.3 Growth model of the solid component**

240 Tissue growth is modelled via the multiplicative decomposition of the deformation gradient tensor  
241  $\mathbf{F}$  that characterizes the solid component deformations, which include both the deformation and  
242 the growth due to loading (Figure 4). For simplicity, the growth tensor is assumed to be volumetric  
243 and proportional to the growth stretch  $\vartheta$ . Following a common approach in the field [32–34, 58] we

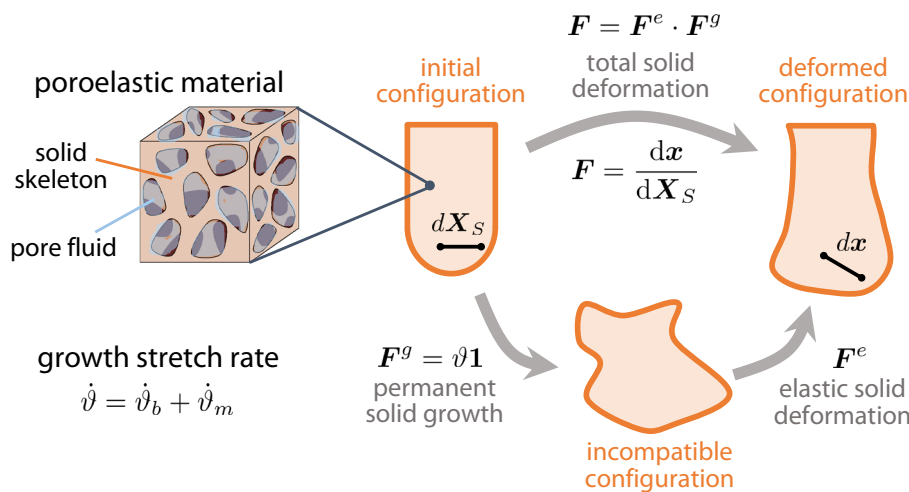

**Figure 4:** Continuum growth in the computational model is based on the multiplicative decomposition of the deformation gradient tensor  $F$  that characterizes the solid component of the poroelastic material.  $F$  maps a vector from the initial or reference configuration  $dX_S$  into a new position after deformation in the current configuration  $dx$ . It is split into an elastic deformation gradient tensor  $F^e$  and a growth tensor  $F^g$ . For simplicity, growth is assumed to be volumetric and proportional to the growth stretch variable  $\vartheta$ , whose rate is the sum of a biological contribution  $\dot{\vartheta}_b$  and mechanical contribution  $\dot{\vartheta}_m$ .

244 consider growth rate to be a sum of biological and mechanical contributions, denoted respectively  
 245 by  $\dot{\vartheta}_b$  and  $\dot{\vartheta}_m$ .

246 The biological contribution represents the intrinsic morphogenetic biological factors that glob-  
 247 ally mediate tissue growth. Similar to past studies of joint morphogenesis [33, 34], we assumed  
 248 it is proportional to chondrocyte density in the bone rudiments. However, unlike these studies,  
 249 our experimental measurements of chondrocyte density in a regenerating axolotl humerus re-  
 250 vealed an approximately constant value throughout the bone rudiment (Figure B.1). Therefore,  
 251 we defined a constant biological growth stretch rate  $\dot{\vartheta}_b$  in time and space, within the humerus  
 252 geometry and throughout the whole simulation time period.

253 The mechanical contribution is a function of the selected mechanical stimulus locally driving  
 254 tissue growth. Mechanical loading is known to modulate the synthesis of ECM in chondrocytes.  
 255 Collagen and aggrecan production, the main components of ECM in cartilage, depends on the  
 256 magnitude, duration and type of loading. In particular, in vitro experiments have shown that cyclic  
 257 compression promotes ECM production while static loading either has no effect on collagen and  
 258 aggrecan levels, or inhibits cartilage growth [37–41]. Based on this experimental evidence, past  
 259 models considered (compressive) hydrostatic stress as a driver of mechanical growth [33–35].  
 260 Even with the simplifying assumptions considered and generic joint shapes used, Giorgi et al. [34]  
 261 could predict anatomically recognisable joint shapes based on different starting joint configuration  
 262 and applied movements. Their results indicate that hydrostatic stress could be mediating tissue  
 263 growth in response to mechanical load. However, models to date used a single-phase elastic  
 264 material to represent tissue behaviour and, hence, were unable to inherently distinguish between  
 265 dynamic and static loading effects. Our poroelastic model overcomes this limitation and, for the  
 266 first time, we are able to define mechanical growth proportional to a dynamic variable linked to  
 267 the movement-induced fluid flow. We selected pore pressure of the fluid component, a hydrostatic  
 268 measure akin to the hydrostatic stress used in past models, as the mechanical stimulus. Fluid  
 269 pressure is the simplest stimulus available in our model to begin to explore how dynamic external  
 270 loading could be shaping the growing joint.

271 The details of the growth model and its numerical implementation are provided in Appendix B.

## 272 **3.4 Finite element implementation**

273 The discretized governing equations and continuum growth model were implemented in the  
274 open source finite element library `deal.II` [59]. The code used in this study is an extension  
275 of the poro-viscoelastic numerical framework provided in Comellas et al. [60] and available in  
276 the `deal.II` code gallery website. Growth was implemented following the algorithm described  
277 in Appendix B.3. Quadratic shape functions were used to approximate the solid displacements,  
278 linear shape functions were used to approximate the pore pressure, and a quadrature of order 3  
279 was considered in all the simulations.

## 280 **3.5 A finite element model of joint morphogenesis**

281 We generated a finite element (FE) model of a generic humerus bone rudiment after cavitation  
282 with the goal of predicting the grown humerus shape at the end of the joint morphogenesis stage.  
283 Given that our model is a tool to probe potential mechanisms of load mechanotransduction in  
284 joint morphogenesis, we strove to keep its parameters as generic as possible.

285 The geometry and loading conditions were informed by experimental data from a regenerating  
286 axolotl forelimb just after joint cavitation. We segmented the bone rudiment shapes of a normally-  
287 regenerating forelimb at 17 dpa in a 3-cm-sized animal (Figure 5a).

288 A mesh was generated based on the smoothed-out surfaced of the segmented humerus with  
289 a total of 512 hexahedral elements. We scaled the geometry size to achieve a cross-sectional hu-  
290 merus size closer to the values identified in our experiments. Meshing of the geometry inevitably  
291 entails a slight loss of surface detail. We computed and visually compared the 2D surface maps  
292 of both the segmented geometry and the meshed geometry (Figure 5b) following a procedure  
293 analogous to the one used in the humerus 3D shape analysis shown in Figure 2f. Comparison  
294 of 2D surface maps confirmed that the meshed surface retained the main characteristics of the  
295 original humerus. Interestingly, the lateral epicondyle was not present yet at this stage of joint  
296 formation for the segmented forelimb, while the medial epicondyle seemed to be already well  
297 formed.

298 Free-flow boundary conditions across all external surfaces except the bottom (proximal) one  
299 were set in the FE model. Vertical displacements of the bottom surface were fixed, and lateral  
300 displacements of nodes in the bottom surface were fixed as shown in Figure 5c. These boundary  
301 conditions allowed for outward growth of the humerus shaft while avoiding spurious translations  
302 as well as the rotation of the whole bone rudiment.

303 The loading conditions applied, summarized in Figure 5d, modelled a 1-second flexion-  
304 extension cycle of the elbow. The growth resulting from a single cycle was extrapolated for  
305 multiple cycles. Loading was applied as a pressure over a roughly circular surface represent-  
306 ing the contact areas between the radius/ulna and the humerus. A sine-like loading profile over  
307 this area was considered, with the loading area sweeping over the humerus surface. The sweep  
308 path was estimated based on anatomical observations of the axolotl elbow joint. The value of the  
309 load profile changed throughout the cycle to mimic the effect of muscle contractions, reaching  
310 the maximum value for the peak flexion position. Load step increments of 0.01s were applied.  
311 Appendix C.1 provides further details of all model parameters. We studied the effect of varying  
312 loading and boundary conditions on our computational results. In this way, we ensured the ro-  
313 bustness of our computational setup to produce results from which to extract meaningful insights.

314 The material properties used, given in Appendix C.1, were either estimated from literature or  
315 based on an educated guess, except for the initial intrinsic permeability of the biphasic material.  
316 Preliminary simulations identified this parameter as having a noticeable impact on the predicted  
317 patterns. Hence, we adjusted its value based on experimental stress-relaxation data obtained  
318 through nanoindentation tests on an axolotl forelimb (Figure C.2).

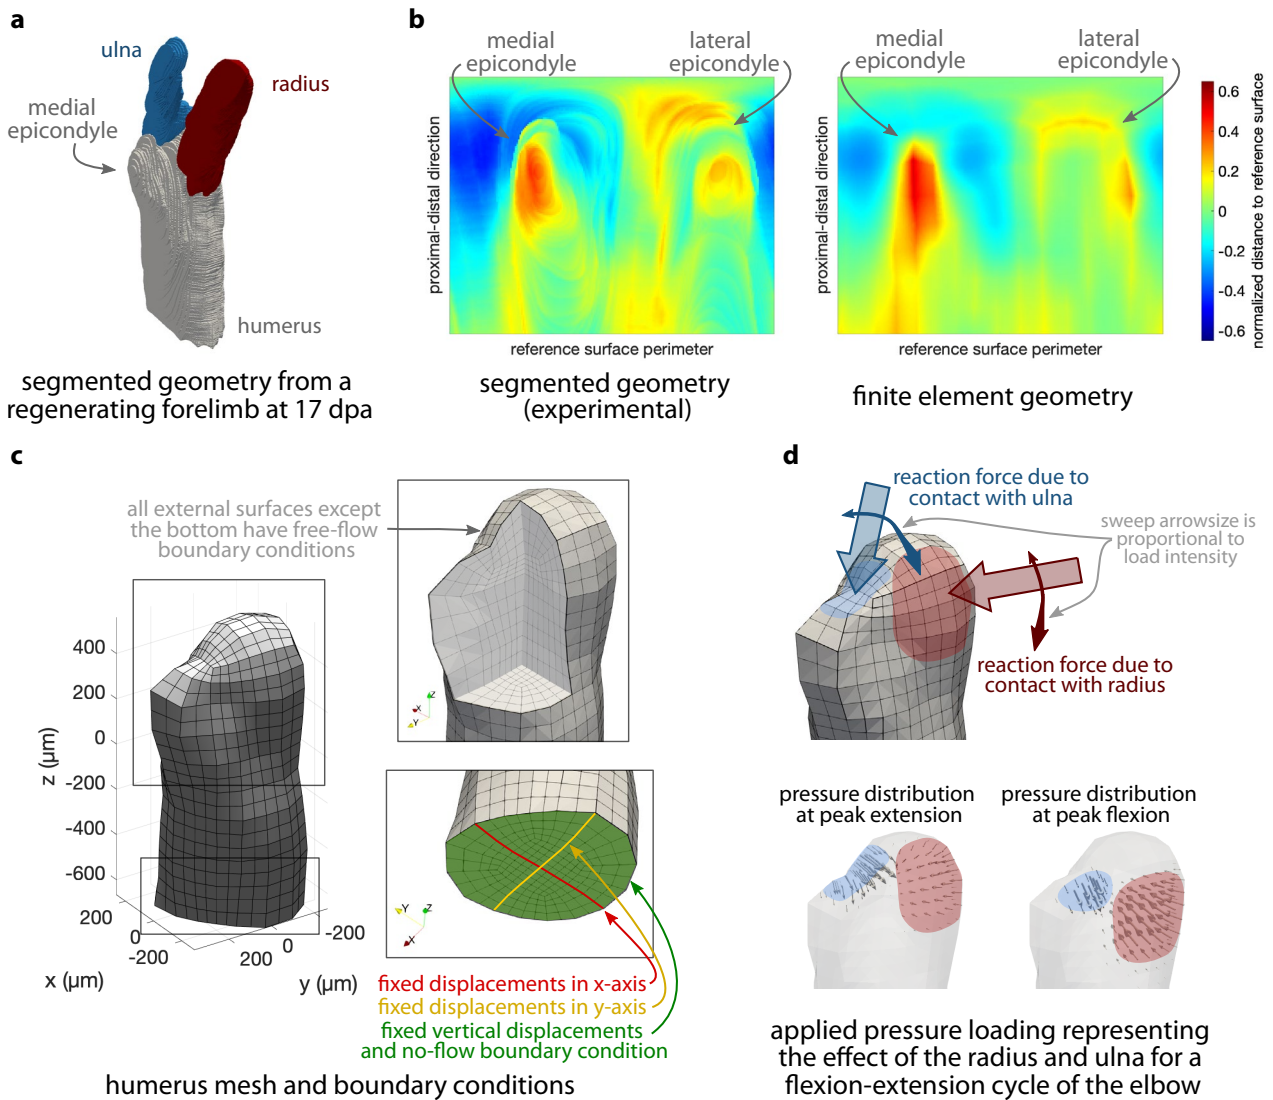

**Figure 5:** Finite element model of the humerus. (a) Segmentation of a regenerating forelimb at 17 dpa used as basis for the geometry. (b) 2D surface maps of the segmented humerus geometry and corresponding finite element approximation. (c) Meshed humerus and boundary conditions applied in the computational simulations. (d) Loading to simulate a flexion-extension cycle of the elbow was applied as a sweeping motion together with a twofold increase in pressure load intensity at peak flexion.

### 319 **3.6 Computational predictions**

320 The simulated flexion-extension cycle resulted in the fluid pore pressure pattern within the hu-  
321 merus bone rudiment shown in Figure 6a. The predicted patterns for other potential mechanical  
322 stimuli are provided in Appendix C.2. Figure 6a shows that regions of high pressure occur under-  
323 neath the load representing the radius contact area throughout the cycle. However, we did not  
324 observe an analogous pressure below the load representing the ulna contact area. Pressure build  
325 up was most pronounced at the posterior proximal part of the humerus shaft. Local tissue growth  
326 due to the mechanical contribution at the end of a loading cycle is shown in Figure 6b. As ex-  
327 pected, growth patterns matched the predicted pressure distributions. The final grown humerus  
328 for a healthy case in which both the biological and mechanical contributions were considered  
329 (Figure 6c, left) was visibly different in shape to the case in which only biological growth was  
330 taken into account, representing the mechanosensitively-impaired growth case (Figure 6c, right).  
331 For the former, local tissue growth was a combination of the results shown in Figure 6b plus a  
332 constant volumetric biological growth throughout the tissue. The latter grown shape exclusively  
333 resulted from the constant volumetric biological growth.

334 To quantify the differences between the two cases, we computed at each surface node the  
335 magnitude of the distance between the original surface and the grown surface, and normalized  
336 this measure with the maximum value of the two cases. We then mapped the resulting patterns  
337 onto a reference surface, fitted to the original surface mesh, and flattened it to obtain a 2D rep-  
338 resentation of normalized growth (Figure 6d). The mapping procedure followed was analogous to  
339 the one used to obtain the 2D surface maps of the experimental humeri, described in Figure 2f.  
340 For both cases, humerus surface growth increased towards the distal portion of the bone rudi-  
341 ment, but the the healthy growth case resulted in larger values as well as a notably asymmetrical  
342 pattern. A larger surface growth was predicted in the area corresponding to the future lateral  
343 epicondyle for the healthy growth case (Figure 6d, left).

## 344 **4 Discussion**

345 Through a combined experimental and computational approach, we have studied how limb mo-  
346 tion during vertebrate joint formation may regulate final joint morphology. We quantified 3D hu-  
347 merus shape in regenerating axolotl forelimb experiments under healthy joint formation conditions  
348 (control group) and for animals with impaired mechanosensitivity in which the TRPV4 channel  
349 was targeted (GSK101 group). In parallel, we developed a biphasic poroelastic finite element  
350 model of humerus tissue growth informed by experimental data. We hypothesized growth was  
351 driven both by biological factors and by a mechanical stimuli linked to the local dynamic loading  
352 conditions in the bone rudiment. We used the computational model to explore potential physical  
353 stimuli that could be contributing to the shaping of the joint.

### 354 **4.1 Impaired mechanosensitivity during joint morphogenesis altered final 355 humerus shape**

356 Our systematic analysis of the regenerating axolotl limbs revealed an altered humerus morpho-  
357 logy for the mechanosensitively-impaired (GSK101) group (Figure 3a). The mean 2D surface  
358 maps computed for each group (Figure 3d) illustrate the main findings: the mean control map ex-  
359 hibits a darker shade of red within the epicondyles (signifying larger normalized volumes) and the  
360 shapes of the medial epicondyles are similar in the two maps; however, the lateral epicondyles  
361 are noticeably different in shape, with a much smaller red area in the GSK101 mean map. We  
362 also analyzed the normalized areas and volumes of the anterior and posterior concavities (blue

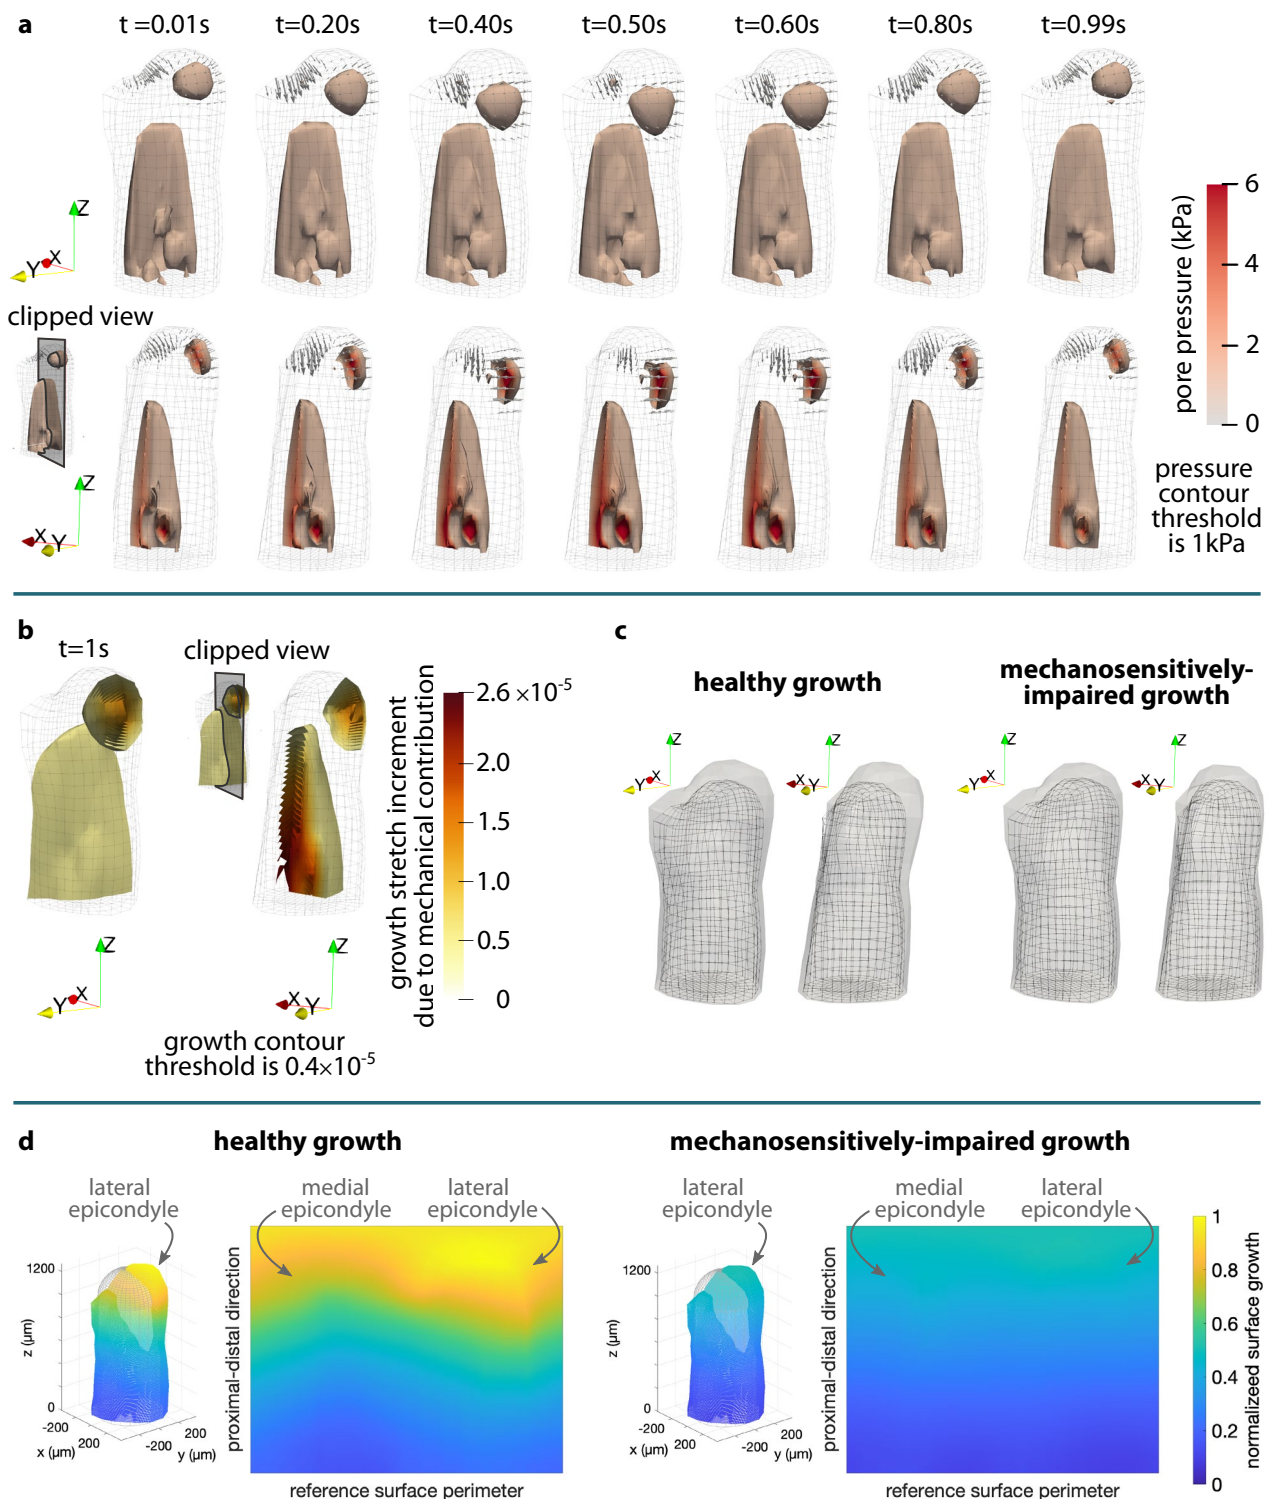

**Figure 6:** Computational predictions of joint morphogenesis. (a) Predicted pressure distribution in the whole humerus (top row) and in a clipped view (bottom row) over a 1-second flexion-extension cycle. (b) Local tissue growth due to the mechanical contribution at the end of one cycle. Local tissue growth due to the biological contribution was constant and not shown here. (c) Grown humerus shape representing a healthy case and a mechanosensitively-impaired case. Local tissue growth in the healthy case (left), comparable to the experimental control group, included both mechanical and biological contributions. The grown humerus shape for the mechanosensitively-impaired case (right), comparable to the experimental GSK101 group, had local tissue growth in response to the biological contribution only. In both cases growth is scaled by a factor of 3600, representing a 1-hour period, and frontal and side views are shown. (d) Quantification of grown humerus shapes based on the normalized surface growth, mapped onto a reference surface like in the experimental data analysis, and then flattened into a 2D map of normalized surface growth.

363 regions in the 2D surface maps of Figure A.2) following an analogous procedure to the epicondyle  
364 measurements and did not observe significant differences between groups for any measurement.  
365 Taken together, this data seems to indicate that, when unable to sense and respond to mechan-  
366 ical cues during joint morphogenesis, the final humerus shape is affected. Mean humerus sur-  
367 faces for the control and GSK101 groups have similar shapes except for the protuberance of the  
368 epicondyles, which is more pronounced for the control case (Figure 3e). In addition, the fact that  
369 the medial epicondyle area and concavity shapes are equivalent in both groups, i.e. that these  
370 features are unaffected by mechanical stimuli, could also signify that the main shape character-  
371 istics of the humerus are already present at the onset of the joint morphogenesis stage.

372 Although we only analyzed a single regenerating limb after cavitation (at 17 dpa) for the pur-  
373 poses of developing the initial computational model, the 2D surface map obtained (Figure 5b, left)  
374 supports the notion that the basic humerus shape could be present already at this stage. We ob-  
375 serve a clearly formed medial epicondyle in this humerus, similar in shape to those of the 33 dpa  
376 regenerated limbs in the experiments (Figure A.2). Together with the experimental findings, this  
377 implies that the medial epicondyle may form in the earlier stages of the joint formation process  
378 and its shape (as measured by the normalized area) may not be as affected by mechanical stimuli  
379 as the lateral epicondyle. The concavities also seem to already be present in the 17 dpa limb but,  
380 interestingly, the lateral epicondyle is barely discernible.

381 Our quantification of 3D shape in regenerating axolotl forelimbs indicates that GSK101 treat-  
382 ment in animals during joint morphogenesis results in altered humerus morphology. We targeted  
383 the TRPV4 ion channel with the agonist GSK101 as a means of impairing the mechanosensit-  
384 ive response of chondrocytes in the treated animals. Numerous studies have shown that chon-  
385 drocytes have several separate but overlapping mechanotransduction pathways [27, 29]. Other  
386 channels of the TRP family have been suggested to have load-associated effects in cartilage [61],  
387 but TRPV4 is undoubtedly the major regulator of mechanical and osmotic signal transduction in  
388 this family. The PIEZO1 and PIEZO2 channels have also been identified as key stretch-induced  
389 mechanotransducers in chondrocytes [62]. It would be interesting to see whether altering these  
390 other channels has effects on morphology similar to those seen in this study, to further tease out  
391 the interrelated roles of each channel in cartilage mechanotransduction.

392 Alternative ways of blocking mechanics in developing joints have been used in the past  
393 to study the effect of mechanical stimuli on joint morphogenesis, namely muscle paralysis in  
394 chicks [6–10] and genetically-modified altered-muscle mice [11–13]. These studies also revealed  
395 morphological differences. Here, we used a TRPV4 agonist, which represents the clinical genetic  
396 deficits associated with abnormal skeletal development [63, 64]. In addition, our 3D analysis of the  
397 humerus surface allows the assessment of shape changes that are not evident in more simple  
398 measures, such as cross-sectional outlines or linear anatomic measurements like humeral head  
399 width.

## 400 **4.2 More prominent epicondyles and increased chondrocyte proliferation** 401 **were not associated with larger humeri**

402 The most striking outcome of our experimental data analysis is that the substantial reduction in  
403 cell proliferation of the GSK101 group (Figure 3a, far left, b and c) was not accompanied by smal-  
404 ler humeri sizes (Figure 3a, centre left). To ensure that the similar humeri fitted diameter values  
405 between the two groups were not due to an insufficiently sensitive measurement method, we  
406 computed additional metrics using an alternative methodology (see Appendix A.1). All measures  
407 of humeri shaft size computed indicated there were no significant differences between the two  
408 groups.

409 This apparent discrepancy could be due to the axolotl long cell cycles, which have been  
410 recorded to be up to 88 hours in regenerating tissues [65, 66]. Then, throughout the 10 day

411 experimental treatment, few complete cycles would have occurred. Considering that proliferating  
412 cells were only a relatively small percentage of total chondrocytes in the bone rudiment, and  
413 the small amount of cell cycles completed, maybe the total amount of cell proliferation was not  
414 enough to produce actual changes in bone rudiment size. In addition, our quantification of cell  
415 proliferation corresponded to a 18-hour window at the end of the experiment, which may not be  
416 representative of the complete treatment period.

417 Yet, we identified a decrease in normalized epicondyle volumes and in the lateral epicondyle  
418 area for the GSK101 group, which raises the question whether reduced cell proliferation could  
419 be related to altered humerus shape. Epicondyle cartilage growth has been linked to cell prolifer-  
420 eration in developing chick knee joints [8]. Interestingly, regulation of chick embryo limb growth  
421 in response to motility was linked to cell proliferation only in specific growth plates in a separate  
422 study [9]. In the present study, we did not observe proliferation localized to the distal part, on the  
423 contrary it was seemingly homogeneously distributed (Figure 3b and c). Therefore, a direct link  
424 between cell proliferation location and localized tissue growth could not be made based on our  
425 experimental observations.

426 Chondrogenesis is driven by extracellular matrix (ECM) deposition, which is not necessarily  
427 tied to chondrocyte proliferation. Our AHA staining of the regenerated axolotl forelimbs showed  
428 no apparent difference in amount of total protein translation between the control and GSK101  
429 animals for the 18-hour period imaged with our technique, but it is highly likely that the specific  
430 proteins that contribute to tissue growth, such as ECM proteins, could lead to increased growth in  
431 particular areas. Alternatively, directional cell growth, independent of cell proliferation, could lead  
432 to differential growth in particular areas of the tissue.

433 Injections in experiments started at 22 dpa as this was the estimated time of joint cavitation  
434 in the regenerating forelimbs for animals 3-5 cm in size. We subsequently analyzed a 17 dpa  
435 regenerated forelimb of a 3-cm-sized animal to develop our finite element model, which revealed  
436 that the bone rudiments were fully formed and separated, and the humerus already had a rudi-  
437 mentary shape, including a defined medial epicondyle. It is possible that our experiments in fact  
438 targeted the final stages of joint morphogenesis, and the bone rudiment was already close to  
439 its final size from the start of the injections. Given that regenerating limbs grow outwards from a  
440 limb bud that is created from a fully-grown stump, the proximal portion of the humerus is already  
441 correctly sized, while the joint is undergoing morphogenesis in the distal part. In contrast, during  
442 development, one would expect the joint to form as bone rudiments around it are also growing  
443 in size. Considering all the above, there are multiple possibilities as to why no difference was  
444 observed in humerus shaft size between the two experimental groups.

### 445 **4.3 Local fluid pressure may promote tissue growth during joint morpho-** 446 **genesis**

447 Our experimental results provide additional confirmation that mechanical forces play a role in  
448 joint morphogenesis. However, how mechanical stimuli are translated into actual tissue growth  
449 and ultimately determine joint shape is still not well understood. Our computational model of joint  
450 morphogenesis provides a complementary tool to the experimental studies. Through hypotheses  
451 and simplifying assumptions, we can isolate critical contributors to the mechanotransduction of  
452 mechanical loading into chondrogenesis and subsequent shaping of the joint.

453 The computational results show that compressive fluid pressure is an adequate predictor of  
454 joint morphogenesis. In the predicted normalized surface growth map for the healthy growth case  
455 (Figure 6d, left) the lateral epicondyle exhibited a considerably larger amount of growth than the  
456 medial epicondyle, which is in agreement with the larger normalized area of the lateral epicon-  
457 dyles and no change of the medial epicondyles identified in the experimental control group with  
458 respect to the GSK101 group (Figure 3a, far left). The predictions for the healthy growth case



459 also exhibited more growth towards the distal area than the mechanically-impaired one (Fig-  
460 ure 6d, right), which only had a slight gradient in the proximo-distal direction. These differences  
461 matched our experimental findings on decreased normalized volumes in both epicondyles of the  
462 GSK101 group with respect to the control group (Figure 3a, centre left).

463 Certainly, our model points to a relationship between the fluid pressure distribution and the  
464 shaping of the joint. Chondrocytes might not be sensing interstitial hydrostatic pressure directly,  
465 but rather a different biophysical factor related to it. Osmotic stresses have been repeatedly identi-  
466 fied as the stimuli triggering a series of signalling events in relation to the TRPV4 channel, that are  
467 propagated into changes in gene expression and ECM synthesis. Yet, studies have shown that os-  
468 motic loading as well as mechanical loading elicit responses of the TRPV4 channel [23,27,28,30].  
469 Furthermore, hydrostatic and osmotic pressures have similar effects on cartilage formation [67],  
470 and they both affect intracellular ion signalling in chondrocytes [68,69]. It is not within the scope of  
471 this study to tease out the complex interrelations between the osmotic and hydrostatic pressures  
472 induced by mechanical loading on cartilage. Many studies have shown that hydrostatic pressure  
473 increases cartilage gene expression and matrix formation (see review by [70]) and, hence, we se-  
474 lected fluid pressure as a driver of mechanical growth in our model since it was the simplest most  
475 reasonable option. Our computational results indicate that fluid pressure can predict local tissue  
476 growth in the experimentally-informed model of joint morphogenesis developed in this study.

#### 477 **4.4 Poroelasticity can be used to explore how dynamic loading dictates** 478 **bone rudiment morphology**

479 Due to the nature of the poroelastic tissue, only compressive dynamic loading can generate  
480 the non-homogeneous fluid pressure pattern within the humerus that dictates tissue growth in  
481 our computational model (Figure 6a). In contrast, static loading generates an initial pressure  
482 distribution that quickly dissipates as fluid seeps out of the bone rudiment (Figure C.2c). Such  
483 behaviour is in agreement with experimental studies showing that cartilage growth is promoted by  
484 repetitive compressive loading while static loading inhibits it [37–41]. Unlike our previous models  
485 of joint morphogenesis [34, 35], we are now able to inherently capture the effect due to the type  
486 of loading imposed owing to the biphasic approach that incorporates the fluid flow component  
487 into the modelling. An earlier computational study [8] used poroelasticity to relate local patterns  
488 of biophysical stimuli to the emergence of joint shape in a model of a chick knee, but could not  
489 predict growth morphologies. Through the solid component growth, our model goes a step further  
490 and can more confidently relate local tissue growth to final bone rudiment morphology based on  
491 loading-induced mechanical stimuli.

492 We explored alternatives to the compressive pore pressure as mechanical stimuli for our  
493 growth model (see Appendix C.2). Several measures of compression and fluid flow in the tis-  
494 sue were considered, with the idea of identifying and implementing an alternative mechanical  
495 growth stimulus in our formulation. We selected the positive divergence of the seepage velocity  
496 because it is a measure of the rate of compression on the solid component of the material and  
497 its distribution within the humerus is quite different from the fluid pressure pattern (Figure C.3b,  
498 top row). The resulting local tissue growth due to the mechanical contribution was distributed  
499 more evenly towards the distal part of the humerus (Figure C.4a), instead of being localized be-  
500 low the radius contact loading (Figure 6b). In addition, less growth was observed in the bottom  
501 part of the humerus for the alternative model. Interestingly, this produced an apparent rotation  
502 of the humerus grown surface (Figure C.4b) rather than the slight bending and outward growth  
503 observed broadly around the lateral epicondyle region for the pressure-based mechanical growth  
504 (Figure C.1). Further study would be required to ensure artefacts due to inadequate loading or  
505 boundary conditions are not at play here before discarding the rate of tissue compression as a  
506 potential biophysical stimuli within the joint morphogenesis process.

507 These exploratory simulations demonstrate the potential of the proposed model as a tool to  
508 unravel the mechanisms at play in the shaping of the joint. Through the computational study  
509 of how different measures of pressure, compression, and fluid flow evolve in response to load-  
510 ing setups representative of in vivo conditions, we could identify potential biophysical stimuli for  
511 further study in experiments.

## 512 **4.5 Future research directions**

513 To advance in our understanding of how movement-induced loading drives joint formation, we  
514 must continue to tease out the mechanosignalling pathways in chondrocytes. Significant progress  
515 is being made in determining the activation mechanisms of TRPV4 and PIEZO ion channels.  
516 Yet, the connection across scales – from organ-level loading to molecular response – is often  
517 overlooked. How are mechanical stimuli transduced within the tissue to the cells? What biophys-  
518 ical measures are cells exactly responding to? Is it hydrostatic pressure, osmotic pressure, fluid  
519 velocity, strains, shear, a combination of these, or something else? New insights into cartilage  
520 mechanotransduction would have broad implications beyond the study of joint formation.

521 Focusing specifically on elucidating the mechanisms of joint morphogenesis, we require ad-  
522 ditional experimental studies that target other mechanosensitive channels such as PIEZO1 and  
523 PIEZO2. In this way, we could better distinguish the different mechanical stimuli involved in the  
524 shaping of the joint. Together with improved computational models, e.g. incorporating osmotic  
525 pressure into the formulation and modelling the complete joint, it would allow us to unequivocally  
526 identify the biophysical drivers of growth during joint formation.

527 We must expand our focus beyond the joint morphogenesis stage and continue to investig-  
528 ate the mechanobiology of the whole joint formation process. Our experimental findings seem to  
529 indicate that the joint already has its initial shape shortly after cavitation and mechanical load-  
530 ing alters this shape at the local level. It would be interesting to determine whether cavitation  
531 is influenced by mechanical stimuli or purely biologically-driven. Also of interest is the ossifica-  
532 tion process in the later stages of joint development. Further studies are required to clarify the  
533 mechanisms at play during cavitation and ossification. Emerging experimental techniques like  
534 whole mount staining and imaging provide the opportunity to explore the 3D spatial distribution  
535 of mechanosensitive growth regulators involved in cavitation (e.g. Gdf5, Noggin and Wnt) and  
536 ossification (e.g. Ihh and Pthrp) during joint formation. Developing such experiments in close as-  
537 sociation with computational modelling will provide a powerful tool that will help us advance in our  
538 understanding of the mechanobiology of joint formation.

## 539 **5 Conclusions**

540 The effect of loading-induced mechanical stimuli on joint morphogenesis was studied through the  
541 systematic quantification of 3D humeri shapes in axolotl forelimbs. Normally-regenerating limbs  
542 were compared to those of animals in which chondrocyte mechanosensitivity was impaired by  
543 the administration of a TRPV4 agonist. Results demonstrated that mechanics has a role in the  
544 shaping of the joint, but a rudimentary humerus shape seemed to be already present in the initial  
545 stage of joint morphogenesis.

546 We developed a finite element model of joint morphogenesis with cartilage modeled as a  
547 poroelastic material, in which growth of the solid part was due to a constant biological component  
548 as well as a loading-dependent mechanical component that includes its dynamic effects. Com-  
549 putational results indicated fluid pore pressure is a reasonable predictor of local tissue growth  
550 and ultimate joint shape, even if chondrocytes might not be directly sensing and responding to

551 hydrostatic pressure. The computational model presented provides a tool to explore alternative  
552 mechanical stimuli that may also be critical in joint morphogenesis.

553 Integrating experiments and computational modelling provides interesting insights that experi-  
554 ments alone cannot deliver. The combined approach presented in this work allowed us to validate  
555 the mechanical regulatory hypotheses with an in silico model. Such methodology will become in-  
556 dispensable as we advance in the study of mechanobiological processes like those involved in  
557 joint formation.

558 **Data Accessibility** The original microscopy data, the scripts used to process the data, and the com-  
559 putational code will be made available when the article is published.

560 **Competing interests** All authors declare they have no competing interests.

561 **Author Contributions** SJS and JRM conceived, designed and coordinated the study. JEF performed  
562 the main axolotl experiments and TJD provided additional experimental data. EC, GK, KL and TM pro-  
563 cessed the experimental data under the guidance of SJS. EC, SJS, JRM and TJD analyzed and inter-  
564 preted the experimental results. EC developed the theoretical model formulation with the collaboration of  
565 SJS and JJM. EC implemented the computational model and performed the numerical simulations. EC,  
566 SJS and JJM analyzed and interpreted the computational results. EC and SJS drafted the manuscript. All  
567 authors revised and approved it for publication.

568 **Acknowledgements** The authors would like to acknowledge Eun Kyung Jeon for providing the far red  
569 nuclear stained limb image, Vineel Kondiboyina for the nanoindentation test data, Yash Kulkarni for con-  
570 tributing to the bone rudiment segmentations, and Soha Ben Tahar for exploratory finite element studies.  
571 EC thanks Markéta Tesařová for sharing their stl files of a newt limb.

572 Microscopy images were obtained from the Harvard University Center for Biological Imaging and the  
573 Northeastern University Chemical Imaging of Living Systems core. This work was completed using the  
574 Discovery cluster, supported by Northeastern University's Research Computing team. We acknowledge  
575 animal support from the Ambystoma Genetic Stock Center funded by NIH grant P40-OD019794.

576 **Funding Statement** This project has received funding from the European Union's Horizon 2020 re-  
577 search and innovation programme under the Marie Skłodowska-Curie grant agreement No 841047 and  
578 the National Science Foundation under grant number 1727518. JJM has been also funded by the Spanish  
579 Ministry of Science and Innovation under grant DPI2016-74929-R, and by the local government Generalitat  
580 de Catalunya under grant 2017 SGR 1278. KL was supported by a Northeastern University Undergraduate  
581 Research and Fellowships PEAK Experiences Award.

582 **Ethics** Ethics Animal experimentation: axolotls (*Ambystoma mexicanum*: d/d RRID Catalog #101L) were  
583 either bred in captivity at Northeastern University or purchased from the Ambystoma Genetic Stock Center  
584 at the University of Kentucky. Experiments were performed in accordance with Northeastern University In-  
585 stitutional Animal Care and Use Committee. For all experiments, animals were anaesthetised by treatment  
586 of 0.01% benzocaine until visually immobilized.

## 587 Appendix A Additional experimental results

### 588 A.1 Alternative measures of humeri shaft

589 Our statistical analysis of the diameters of the cylinders fitted to the humeri shaft produced no  
590 significant difference between the control and GSK101-treated groups (Figure 3a). To ensure this  
591 surprising result was not due to an insufficiently sensitive method of measurement of the humeri  
592 shaft size, we computed additional metrics using an alternative methodology.

593 First, we extracted a standardized portion of the humerus shaft by trimming the distal and  
594 proximal parts of the aligned humerus surface obtained in Figure 2f (left). We removed the surface  
595 portion above a vertical distance equal to the fitted diameter (measured from the most distal part  
596 along the vertical axis), and then kept a portion of the shaft equal to 0.25 times the fitted diameter  
597 in thickness. To measure the size of the extracted shaft, it was divided into 20- $\mu\text{m}$ -thick slices  
598 and the surface of each slice was projected onto the cross-sectional x-y plane. The resulting 2D  
599 projected shape was converted to a binary image. Given that the extracted shafts were about  
600 120  $\mu\text{m}$  in thickness, we obtained between 5 and 7 projected 2D shapes per humerus. Finally,  
601 we computed a series of shape metrics for each projected shape and averaged the values of  
602 each for all shapes in a limb. The metrics computed were area, perimeter, equivalent diameter  
603 (i.e. the diameter of a circle with the same area as the projected shape), major axis, and minor  
604 axis.

605 We grouped all humeri measurements for each metric and tested for normality with a Shapiro-  
606 Wilk test. All data was normally distributed. We then used a one-way ANOVA test to compute the  
607 p-values, which were all above 0.1. Results confirm that there is no significant difference in humeri  
608 size between the control and GSK101-treated groups (Figure A.1).

### 609 A.2 Humeri 2D surface maps

610 The 2D surface maps of all humeri, computed following the methodology described in Section 2.2,  
611 are shown in Figure A.2. Maps have varying heights due to length variability in the segmented  
612 humerus bone rudiments. All maps have been aligned in the horizontal direction based on the  
613 centroid position of the medial epicondyle. Two control limbs had to be discarded because the  
614 segmented humerus was too short to be properly aligned following the methodology developed.

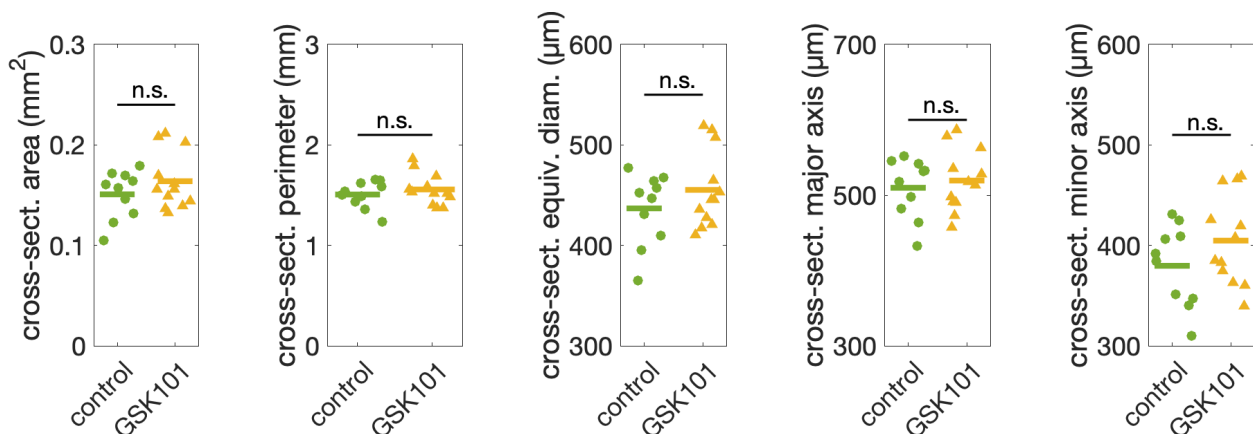

**Figure A.1:** Results of the statistical analysis on the data points obtained following an alternative methodology to measure humeri shaft size. All data was normally distributed (Shapiro-Wilk test) and we performed a one-way ANOVA test to obtain p-values, which were all above 0.1.

**a control**

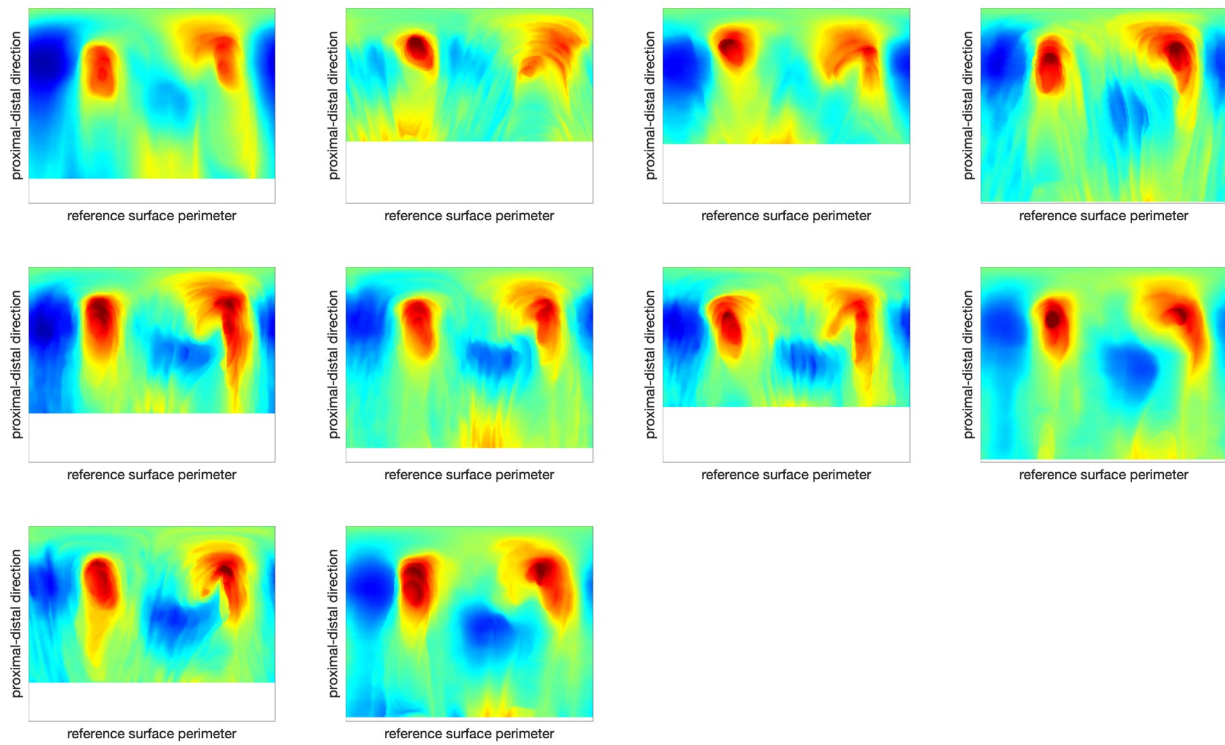

**b GSK101**

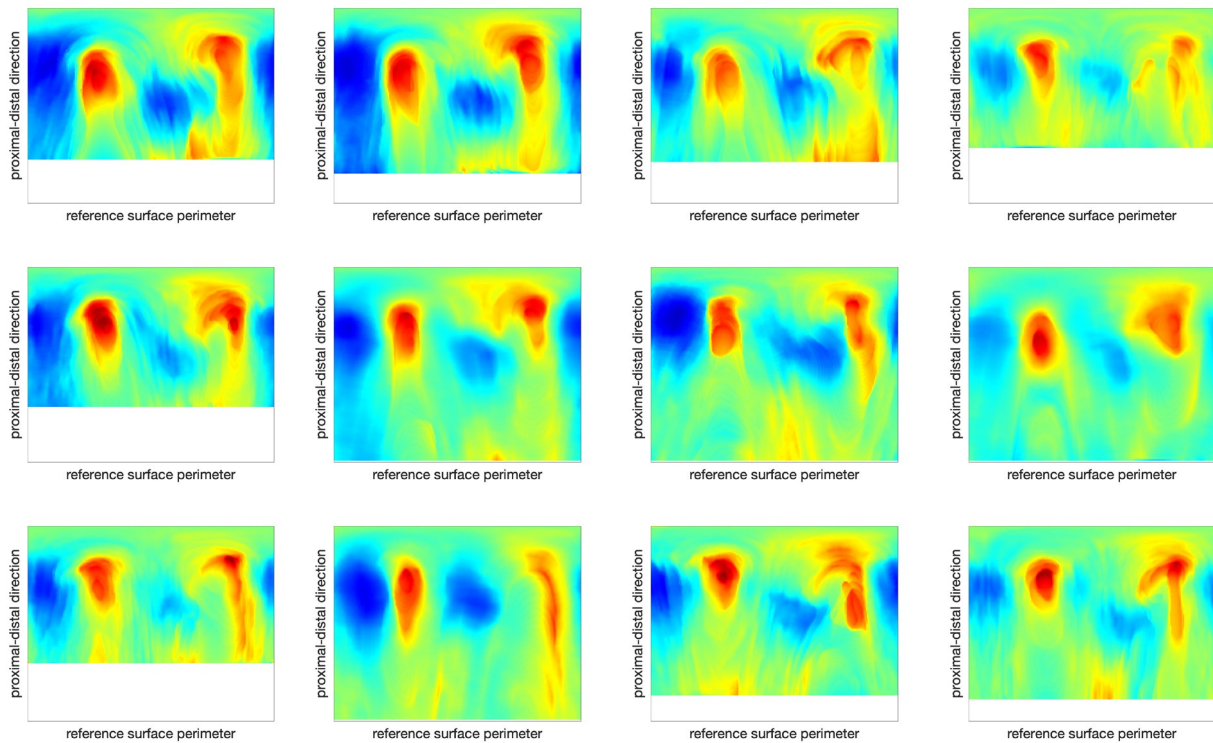

**Figure A.2:** Computed 2D surface maps of the humeri for (a) the control and (b) the GSK101-treated limbs.

## 615 **Appendix B Numerical framework for poroelasticity with con-** 616 **tinuum growth**

### 617 **B.1 Introduction**

618 We propose a finite element biomechanical model of growth at tissue level to study how specific  
619 changes in limb motion regulate joint morphology. Bone rudiments undergoing the joint morpho-  
620 genesis stage are mostly composed of chondrocytes. Hence, the cartilaginous tissue is modeled  
621 as a biphasic poroelastic material consisting in a fluid-saturated nonlinear porous solid. The ex-  
622 isting nonlinear poroelastic formulation [60] implemented in `deaf.II` [59] was extended to incor-  
623 porate continuum growth [71].

624 Here, we provide a brief overview of the poroelastic formulation and describe the derivation  
625 and implementation of the continuum growth portion of the computational model.

### 626 **B.2 Kinematics**

627 The biphasic material is composed of a hyperelastic solid skeleton (S) and a pore fluid constituent  
628 (F) that occupy simultaneously a given spatial position  $\mathbf{x}$  in the current configuration at time  $t$ .  
629 Then, the constituent deformation map is  $\mathbf{x} = \chi_S(\mathbf{X}_S, t) = \chi_F(\mathbf{X}_F, t)$ , where  $\mathbf{X}_S$  and  $\mathbf{X}_F$   
630 correspond to the different material positions in the reference configuration at the reference time  
631  $t_0$  of the solid and fluid constituents, respectively. The solid displacement is  $\mathbf{u}_S = \mathbf{x} - \mathbf{X}_S$ , and  
632 its material deformation gradient is  $\mathbf{F}_S = \partial\mathbf{x}/\partial\mathbf{X}_S$ , where the subscript ‘S’ will be dropped for  
633 clarity in the subsequent derivations. The seepage velocity describes the motion of the fluid with  
634 respect to the deforming solid material, i.e.  $\mathbf{w}_F = \mathbf{v}_F - \mathbf{v}_S = \partial\chi_S/\partial t - \partial\chi_F/\partial t$ .

635 Note that the solid and fluid constituents are assumed to be separately incompressible, but  
636 the biphasic material is compressible owing to the fluid flow within the pores of the deforming solid  
637 skeleton. In addition, the saturation condition establishes  $n^S + n^F = 1$ , where  $n^S$  and  $n^F$  are the  
638 volume fractions of the solid and fluid constituents, respectively. Based on the volume balance of  
639 the solid skeleton, the former can be integrated towards  $n^S = n_{0S}^S/J$ , where  $J = \det(\mathbf{F}) > 0$  and  
640  $n_{0S}^S$  is the initial solid volume fraction, a measure of the biphasic material’s initial porosity.

### 641 **B.3 Continuum growth**

642 We introduce volumetric tissue growth through the multiplicative decomposition of the material  
643 deformation gradient tensor of the solid component,

$$\mathbf{F} = \mathbf{F}^e \cdot \mathbf{F}^g \quad \text{with} \quad \mathbf{F}^g = \vartheta \mathbf{1}. \quad (1)$$

644 The rate of the growth stretch  $\vartheta$  determines the isotropic growth, and  $J^e = \det(\mathbf{F}^e) > 0$  is the  
645 Jacobian of the elastic part of the material deformation gradient tensor of the solid component,  
646  $\mathbf{F}^e$ .

647 Following past studies [33, 34], we hypothesize that growth stretch rate is given by the sum of  
648 a biological and a mechanical contributions,

$$\dot{\vartheta} = \dot{\vartheta}_b + \dot{\vartheta}_m. \quad (2)$$

649 The rationale is that certain growth will occur during limb formation regardless of external mech-  
650 anical stimuli, owing to morphogenetic cues that result, for example, in cell proliferation and ex-  
651 tracellular matrix deposition. The amount of biological growth is, therefore, assumed to be pro-  
652 portional to chondrocyte density,  $C_d$ . We experimentally measured chondrocyte density in a re-  
653 generated axolotl humerus and found that it was approximately constant along its proximo-distal

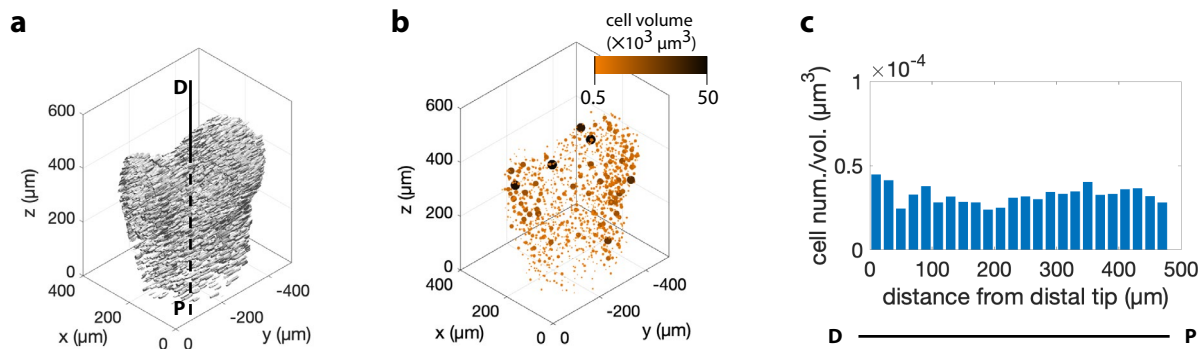

**Figure B.1:** Experimental data used to determine a constant biological growth function. (a) The chondrocyte nuclei outlines were extracted from a far red nuclear staining 3D light sheet image stack of a regenerated axolotl forelimb using Cellpose [72]. Cell nuclei surfaces are shown in 3D space after vertically aligning the proximo-distal (P-D) axis of the humerus in Matlab [52]. (b) Cell nuclei positions and corresponding volumes in 3D space were obtained with the Fiji plugin 3D Objects Counter [49], imported and aligned in Matlab. Outliers were removed based on the cut-off volumes  $0.5 \times 10^3$  and  $50 \times 10^3 \mu\text{m}^3$ . (c) Cell density was computed as cell number divided by cross-sectional slice volume, and plotted along the proximo-distal axis. A thickness of  $20 \mu\text{m}$  was used to compute the humeri cross-sectional slice volumes from a segmentation of the whole humerus bone rudiment based on the original 3D image stack.

axis (see Figure B.1). For this reason, we used a constant biological growth function,

$$\dot{\vartheta}_b(C_d) = k_b, \quad (3)$$

where the parameter  $k_b$  modulates the rate of tissue growth due to intrinsic biological factors. The mechanical contribution is proportional to the biophysical stimuli  $\Xi$ , hypothesized to drive local tissue growth. For simplicity, we started our numerical explorations assuming the positive (compression) pore pressure was driving the mechanical portion of tissue growth,

$$\dot{\vartheta}_m(\Xi) = k_m \Xi = k_m \langle p \rangle, \quad (4)$$

where the parameter  $k_m$  adjusts the proportion of mechanical growth to the overall tissue growth, and the Macauley brackets  $\langle \bullet \rangle$  indicate that only positive (compressive) fluid pressure produces mechanical growth. We note that in addition to  $\Xi = \langle p \rangle$ , and in order to explore different feedback mechanisms, other alternative mechanical stimuli have been tested, such as  $\Xi = \langle \text{div}(\mathbf{w}) \rangle$ , which is a measure of local solid component compression rate.

The algorithm used to implement continuum growth in the poroelastic model is given in Figure B.2.

## B.4 Governing field equations

Following standard assumptions as described in [60], the governing field equations are derived from the mass continuity and local linear momentum balance equations of the individual material components. The resulting weak form of the overall linear momentum balance is

$$\int_{\mathcal{B}_0} \nabla(\delta \mathbf{u}) : \boldsymbol{\tau} dV_{0S} - \int_{\partial \mathcal{B}_0^T} \delta \mathbf{u} \cdot \mathbf{T}^* dA_{0S} = 0 \quad \forall \delta \mathbf{u}, \quad (5)$$

and the overall mass balance is

$$\int_{\mathcal{B}_0} \delta p \dot{J}_e dV_{0S} - \int_{\mathcal{B}_0} \nabla(\delta p) \cdot \mathbf{w} J dV_{0S} = 0. \quad \forall \delta p. \quad (6)$$

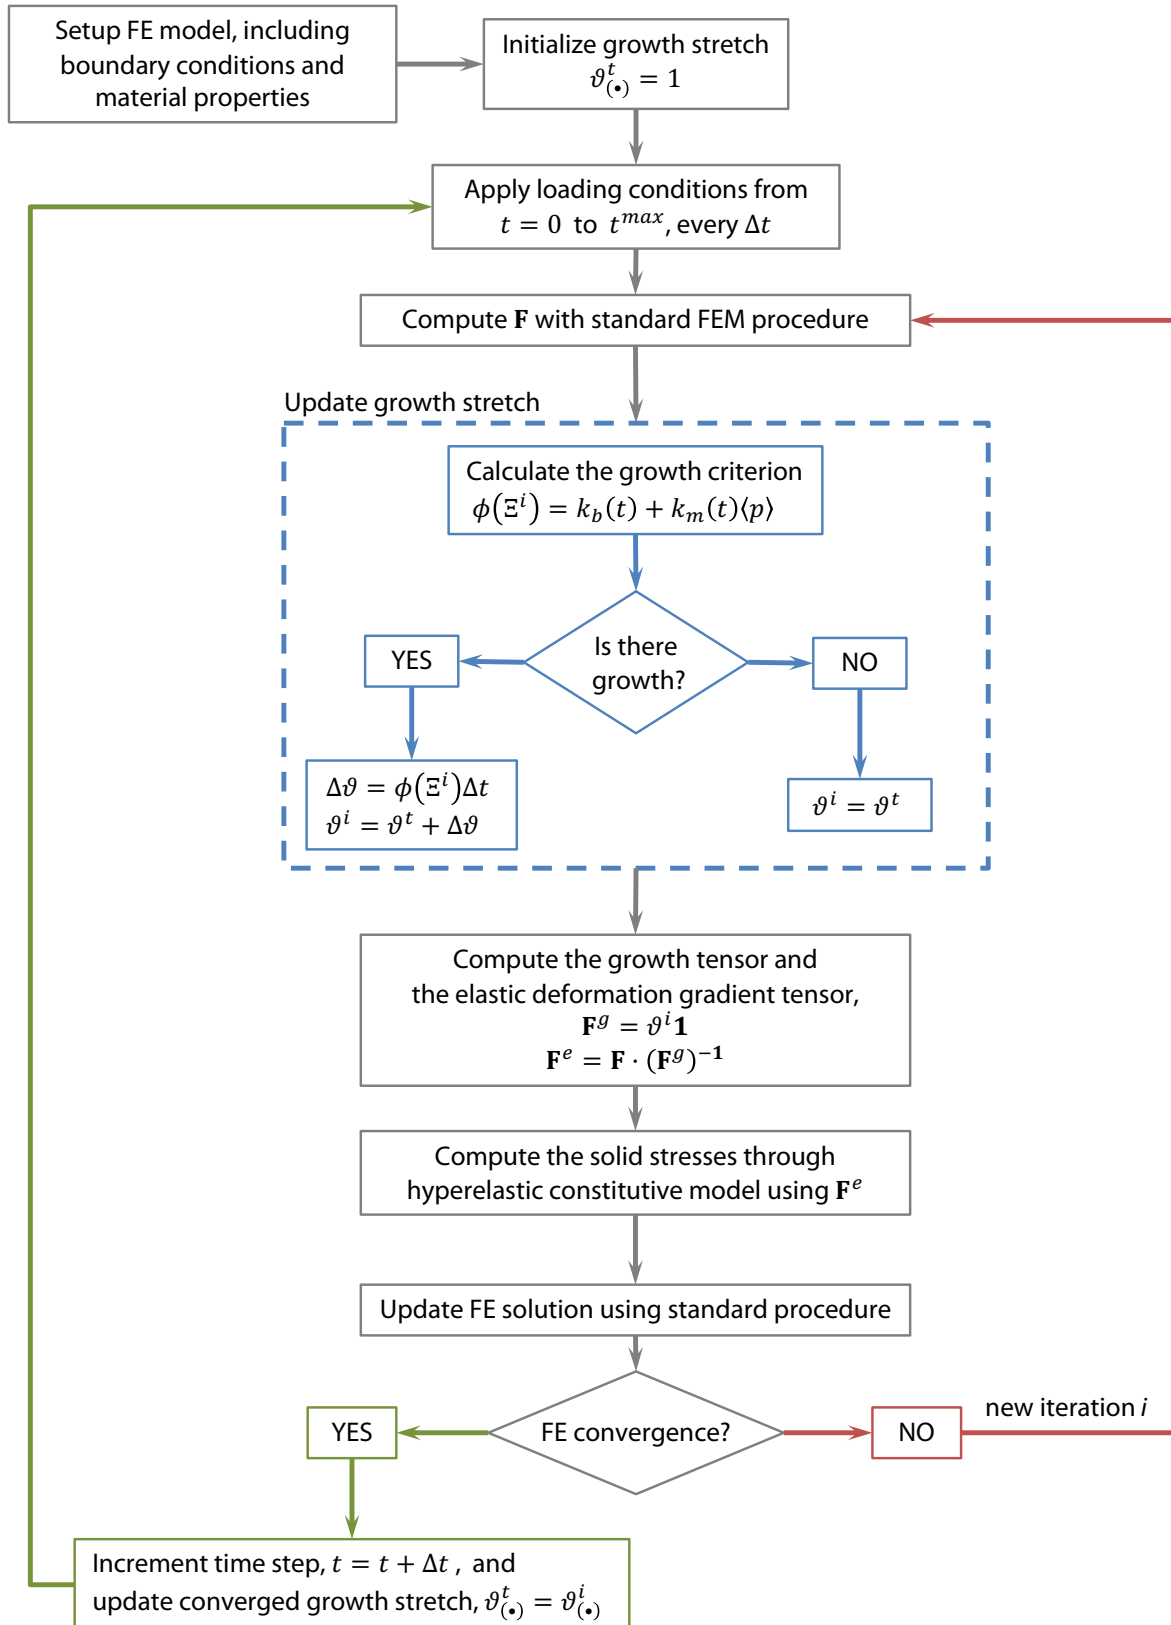

**Figure B.2:** Algorithm for the numerical implementation of growth in the proelastic finite element formulation used. Adapted from [71], the growth stretch in this study does not have a limiting function. The growth increment  $\Delta\vartheta$  can be computed directly because the growth criterion is independent of previous values of  $\vartheta^t$ . The growth rate parameters  $k_b$  and  $k_m$  are time-step dependent to ensure no growth is applied in the first and last time steps, corresponding to the application and removal of the loading conditions.



671 Both equations are given in the reference configuration and introduce the solid displacement test  
 672 function  $\delta u$  and the fluid pore pressure test function  $\delta p$ , respectively. The Kirchhoff stress tensor  
 673  $\boldsymbol{\tau}$  in (5) is defined by the constitutive equation of the solid component (see next Section) and  $\boldsymbol{T}^*$   
 674 is the prescribed traction on the boundary  $\mathcal{B}_0^T$ . Here, we have neglected volumetric forces due  
 675 to the effect of gravity. The volume-weighted seepage velocity  $\boldsymbol{w} = n^F \boldsymbol{w}_F$  introduced in (6) is  
 676 defined by the constitutive equation of the fluid. The term  $\dot{J}_e$  indicates the material time derivative  
 677 of the Jacobian of the elastic deformation gradient tensor. Here, we do not prescribe forced fluid  
 678 flow across the boundaries.

## 679 B.5 Constitutive models

680 The hyperelastic solid behaviour is given by the constitutive equation

$$\boldsymbol{\tau} = \boldsymbol{\tau}_E^{\text{NH}} + \boldsymbol{\tau}_E^{\text{vol}} - p J \mathbf{1}, \quad (7)$$

681 where the ‘extra’ stress is split into a neo-Hookean contribution,

$$\boldsymbol{\tau}_E^{\text{NH}} = \mu \left[ \boldsymbol{F}_e \cdot \boldsymbol{F}_e^T - \mathbf{1} \right], \quad (8)$$

682 and a volumetric term, which accounts for the compressibility effects of the biphasic material,

$$\boldsymbol{\tau}_E^{\text{vol}} = \lambda \left[ 1 - n_{0S}^S \right]^2 \left[ \frac{J_e}{1 - n_{0S}^S} - \frac{J_e}{J_e - n_{0S}^S} \right] \mathbf{1}. \quad (9)$$

683 Here, we introduce the neo-Hookean shear modulus  $\mu$  and the first Lamé parameter  $\lambda$ .

684 A Darcy-like law is used to define the fluid constitutive behaviour,

$$\boldsymbol{w} = -\frac{1}{\mu^{\text{FR}}} \left[ \frac{J - n_{0S}^S}{1 - n_{0S}^S} \right] \boldsymbol{K}_0^S \cdot \nabla p, \quad (10)$$

685 where, for simplicity, gravity contributions have been neglected. Here we introduce the effective  
 686 shear viscosity of the fluid,  $\mu^{\text{FR}}$  and the initial intrinsic permeability  $\boldsymbol{K}_0^S = K_0 \mathbf{1}$ , which is assumed  
 687 to be isotropic.

## 688 Appendix C Details of the computational model and addi- 689 tional results

### 690 C.1 Model parameters

691 The material parameters used in the computational simulations are summarized in Table C.1. In  
 692 the definition of the solid component behaviour, we selected the neo-Hookean shear modulus  
 693 and the initial solid volume fraction based on values found in literature [54, 73]. The first Lamé  
 694 parameter was set to a value roughly two orders of magnitude higher than the shear modulus  
 695 to ensure correct enforcement of the compaction point behaviour and of the incompressibility of  
 696 the solid component. Given the small loading values applied in our simulations, predicted de-  
 697 formations throughout our model were always far from this point and, hence, this value does not  
 698 impact the predicted patterns. The fluid component behaviour was defined through the initial in-  
 699 trinsic permeability and the fluid viscosity. Preliminary simulations revealed that the value of the  
 700 former had a considerable impact on the predicted pressure patterns. Therefore, initial intrinsic  
 701 permeability was estimated based on experimental data, as explained below. The fluid viscosity

702 was set to that of water at 25°C. Finally, the parameters regulating the contribution of the mech-  
 703 anical and biological growth rates to the overall tissue growth were manually adjusted to obtain a  
 704 reasonable proportion between the two contributions for the healthy case.

705 A loading pressure range between 10 kPa at peak extension and 20 kPa at peak flexion was  
 706 applied. This value is a rough guess based on the maximum muscle stress reported for tiger  
 707 salamanders [74] (obtained for an animal mass of 1.3 g, which is the mean mass of the axolotls  
 708 in our study) and an extrapolation of the relative cross-sections between the limb muscle and  
 709 bone rudiment morphologies of a Spanish ribbed newt [75]. The increase in load intensity can be  
 710 interpreted as a representation of the changes in contact force between the bone rudiments due  
 711 to muscle contractions driving the limb flexion-extension motion. Contact area and sweep path  
 712 were estimated based on the bone rudiment 3D surfaces extracted from experimental data.

713 Initially, the whole external surface of the humerus was set to allow free fluid flow across  
 714 it. Upon close analysis of preliminary results, we considered that a bottom surface with no-flow  
 715 condition approximated better the in vivo conditions of the humerus bone rudiment. Figure C.1  
 716 shows the results obtained in our study of the effect that the flow boundary condition in the bottom  
 717 surface has on predicted local tissue growth. We simulated the ulna and radius contact separately  
 718 with the goal of discerning the contribution of each load to the predicted patterns. For each bone  
 719 rudiment we considered only the sweeping motion without any load intensity change and, then,  
 720 a fixed position but a load intensity change. Growth predictions for a free-flow and a no-flow  
 721 bottom surface are roughly equivalent in the distal portion of the humerus for any given loading  
 722 condition. Close to the bottom surface, differences in growth appear due to different pressure  
 723 patterns predicted for the free-flow vs no-flow conditions. A free-flow bottom boundary condition  
 724 enforces all nodes in the surface to have a zero pressure value, which prevents pressure build up  
 725 above the surface. Ideally, we would want to avoid artefacts like these, which arise from a fictitious  
 726 boundary, by modelling the complete bone rudiment. However, due to computational limitations  
 727 and because we are interested in the growth of the distal portion of the humerus, we deemed  
 728 that the approximation provided by our model was sufficient for the purposes of this study.

729 This set of simulations also served to confirm that the contribution of the radius loading to  
 730 growth is much larger than that of the ulna loading. In our main simulations we combined sweep-  
 731 ing motion with load intensity increment for both ulna and radius loading. In this way we simulated  
 732 the change in contact position between bone rudiments during a flexion-extension movement  
 733 (sweeping motion) as well as changes in reaction force between bone rudiments in contact owing  
 734 to the effect of muscles contracting.

735 Time steps of 0.01s were applied for a total of 1.01s to reproduce a flexion-extension cycle.  
 736 Load value increased in a sinusoidal manner, as did the sweeping motion where the load was ap-

**Table C.1:** Material parameters used in the computational simulations.

| Parameter                        | Symbol     | Value  | Units                            |
|----------------------------------|------------|--------|----------------------------------|
| solid shear modulus              | $\mu$      | 2.0e3  | kPa                              |
| first Lamé parameter             | $\lambda$  | 1.0e5  | kPa                              |
| initial solid volume fraction    | $n_{0S}^S$ | 0.17   |                                  |
| initial intrinsic permeability   | $K_0$      | 1.0e-3 | $\mu\text{m}^2$                  |
| fluid viscosity                  | $\mu_{FR}$ | 0.89   | kPa·s                            |
| biological growth rate parameter | $k_b$      | 2.0e-5 | $\text{s}^{-1}$                  |
| mechanical growth rate parameter | $k_m$      | 1.0e-5 | $(\text{kPa}\cdot\text{s})^{-1}$ |

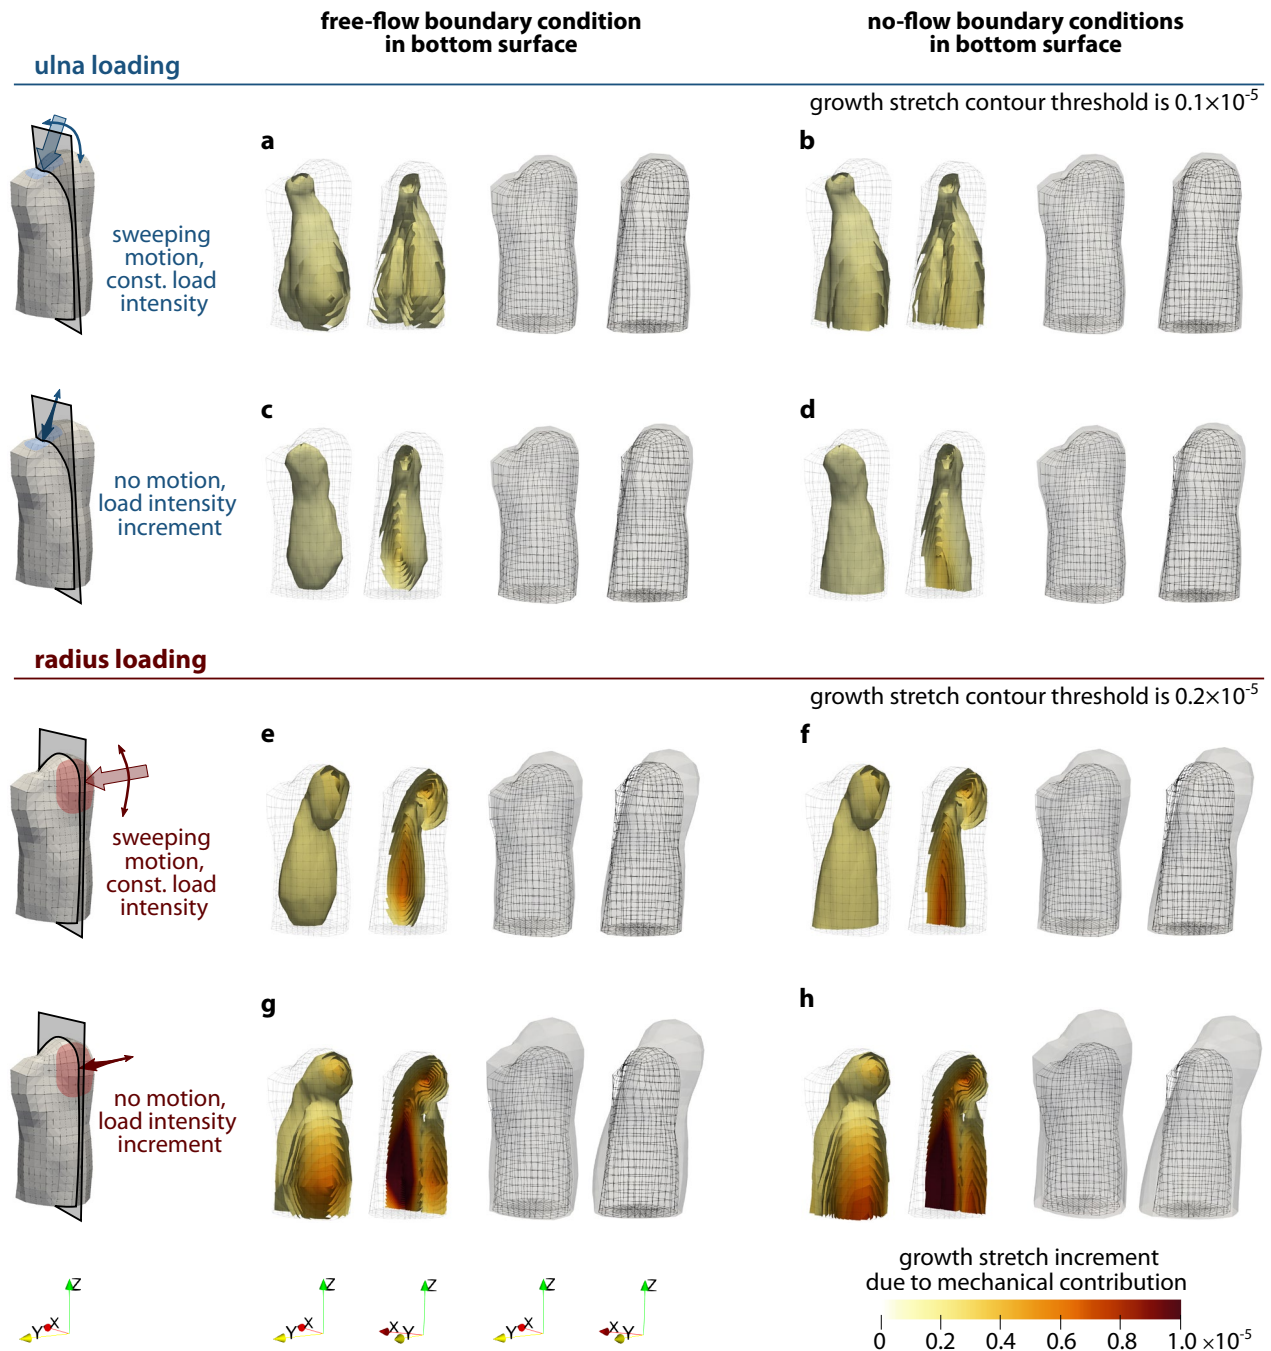

**Figure C.1:** Computational predictions for free-flow and no-flow boundary conditions in the bottom surface. Results are shown separately for ulna and radius loading, with sweeping motion and load intensity change also studied separately. For each loading and boundary conditions combination the left-most image shows the growth stretch increment distribution in the humerus and the centre left image shows a clipped view of the same result. Growth shown is exclusively due to the mechanical contribution, with  $k_m = 5 \cdot 10^{-4}$  (kPa-s) $^{-1}$  at the end of a flexion-extension load cycle. The centre right and right-most images of each simulation correspond to the frontal and side views of the grown humerus shape. For all cases, growth computed after a 1-second-cycle is scaled by a factor of 36000, representing 10 hours of loading.

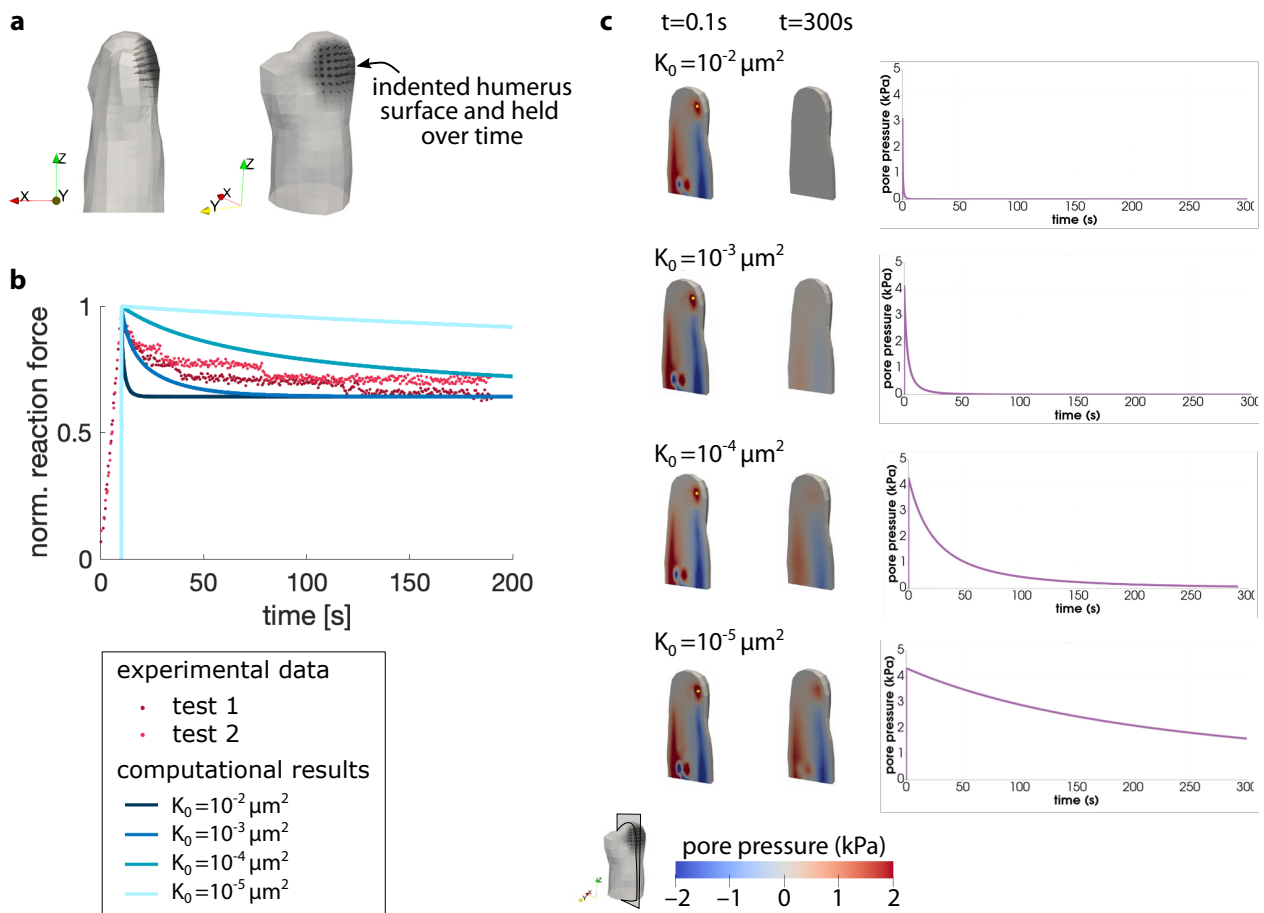

**Figure C.2:** Adjustment of the initial intrinsic permeability based on experimental data. (a) Stress-relaxation computational model used. (b) Reaction force obtained in the nanoindentation experiments on an axolotl limb bone rudiment (dots) and reaction force computed in the stress-relaxation model for different values of  $K_0$  (lines). Reaction force is normalized with its peak value over time for each example. (c) Pressure distribution at the initial (left column) and final (middle column) time steps in a vertical cross-section of the humerus (shown bottom left) for the different values of  $K_0$ . The evolution of the pressure value at the point marked with a yellow asterisk in the left column is shown over time in the right column.

737 plied. The use of sinusoidal increments avoids abrupt changes in the numerical simulation, which  
738 are known to produce unrealistic peaks in predicted variable values. In fact, this is why growth  
739 was not applied in the first and last step, when the load was applied and removed. Preliminary  
740 simulations were run to ensure time step size was not affecting the predicted outcomes. We ob-  
741 served comparable pressure patterns for simulations with same material parameters, boundary  
742 conditions and loading patterns.

743 Figure C.2 shows the stress-relaxation model we used to identify the initial intrinsic perme-  
744 ability value,  $K_0 = 10^{-2} \mu\text{m}^2$ . We compared computational predictions to experimental data from a  
745 nanoindentation test on an axolotl bone rudiment. The indentation rate was 100 nm/s and the  
746 maximum indentation distance of  $5 \mu\text{m}$  was applied with an indenter of radius  $25 \mu\text{m}$ . Relaxa-  
747 tion was recorded over a 3-minute period. We predicted a similar stress-relaxation condition in  
748 our material by applying a static load on the distal part of the humerus (Figure C.2a). We then  
749 measured the total reaction force of the loaded surface over time for different values of  $K_{0s}$  and  
750 compared them to the experimental results (Figure C.2b). This computational example illustrates  
751 the advantage of using a poroelastic material model instead of an elastic one. We are able to  
752 explicitly capture the relaxation of the material under a static load. In this way, we can predict  
753 (and adjust) the dissipation of the pressure accumulated below the loading surface as fluid seeps  
754 out of the sample and the material returns to its relaxed state (Figure C.2c).

## 755 C.2 Exploring alternative mechanical stimuli for growth

756 We hypothesized pore pressure is the mechanical stimuli driving local tissue growth. Our results  
757 show that predicted humerus grown shapes using pressure as a driver of mechanical growth  
758 are consistent with experimental findings. However, it is not clear what are the exact biophysical  
759 stimuli that chondrocytes sense and respond to. The numerical framework set up in this study  
760 provides the opportunity to easily explore alternative stimuli for growth. Figure C.3 shows the  
761 predicted distribution over a flexion-extension cycle of several variables that could potentially  
762 better represent the stimuli sensed by chondrocytes.

763 The volume-weighted seepage velocity  $w$  is the relative velocity of the pore fluid with respect  
764 to the deforming solid skeleton. Its  $L_2$ -norm is a measure of the amount of fluid flow (Figure C.3a),  
765 while its divergence indicates the rate of compression or expansion on the solid component for  
766 positive or negative values, respectively (Figure C.3b). We also computed the increment of a  
767 scalar norm of the solid component stretches,

$$\Delta_{\text{norm}}(\lambda_S) = \sqrt{(\lambda_x^2 + \lambda_y^2 + \lambda_z^2) / 3} - 1, \quad (11)$$

768 where  $\lambda_x$ ,  $\lambda_y$  and  $\lambda_z$  are the stretches of the solid in the global coordinates. A positive incre-  
769 ment indicates expansion of the solid while a negative one is representative of compression  
770 (Figure C.3c).

771 Interestingly, the general pattern of the norm of the seepage velocity (Figure C.3a) and the  
772 negative increment of the norm of the solid stretches (Figure C.3c, middle row) resemble the  
773 predicted pressure patterns and would probably result in similar growth predictions. However,  
774 the rate of compression (Figure C.3b, top row) produces a noticeably different pattern. We also  
775 tested to modify the mechanical growth equation (4) in our model, replacing pressure with the  
776 divergence of the velocity. The predicted local tissue growth and resulting humerus grown shape  
777 are shown in Figure C.4. A value of  $k_m = 10$  was used to obtain local tissue growth of the same or-  
778 der of magnitude as in our previous simulations. The grown humerus shape showed considerably  
779 less amount of surface growth and appeared to rotate instead of bend like in the pressure-driven  
780 mechanical growth predictions. Further studies would have to be conducted to explore the effect  
781 of loading and boundary conditions on this model. Yet, these preliminary results demonstrate the  
782 potential of the computational framework proposed here for exploring how different mechanical  
783 stimuli could be driving local tissue growth and ultimately shaping the joint.

---

**Figure C.3 (following page):** Alternative mechanical stimuli to consider for the finite element growth model. The computational predictions for the evolution of the following variables is shown for a flexion-extension cycle in the humerus. (a) Distribution of the  $L_2$ -norm of the seepage velocity in the humerus (top row) and in a clipped view (bottom row), both given in  $\mu\text{m/s}$ . (b) Distribution of the divergence of the seepage velocity, given in  $\text{s}^{-1}$ . A positive value indicates rate of solid compression (top row) while a negative one indicates rate of solid expansion (bottom row). (c) Distribution of the increment of a scalar norm of the solid stretch. A positive increment indicates solid expansion (top row) while a negative one indicates solid compression (middle row). The two are superimposed in a clipped view of the humerus (bottom row).

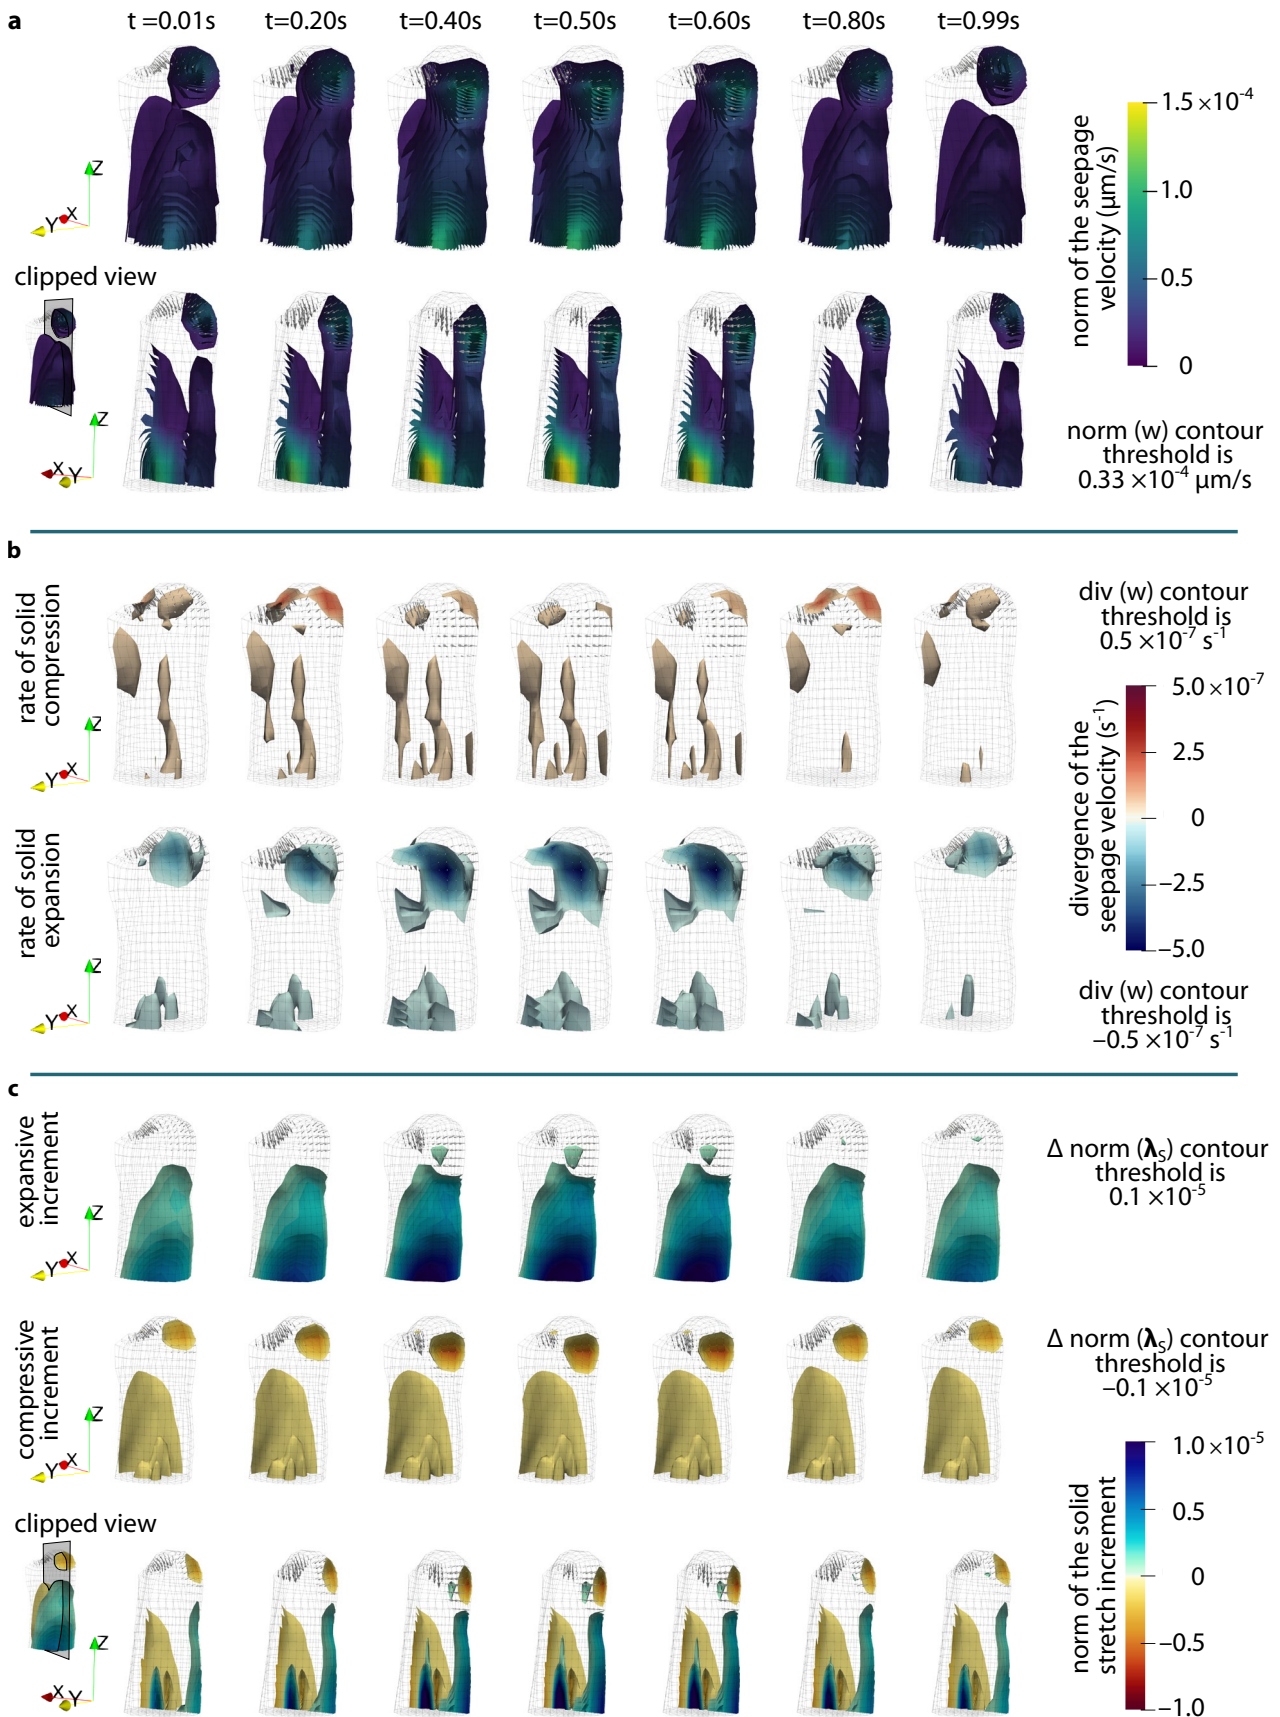

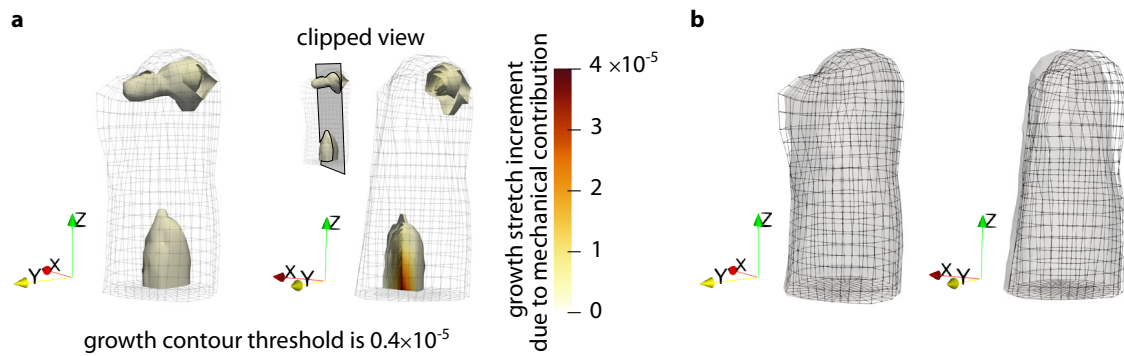

**Figure C.4:** Finite element growth model using  $\langle \text{div}(\mathbf{w}) \rangle$  (positive divergence of the seepage velocity, a measure of the rate of solid compression) as mechanical stimulus. (a) Computational predictions of the local tissue growth due to the mechanical contribution at the end of one flexion-extension cycle. Distribution in the whole humerus (left) and in a clipped view (right). (b) Grown humerus shape scaled by a factor of 86400, representing 24 hours of loading. A frontal view (left) and a side view (right) are shown.

## References

784

- 785 [1] Pacifici M, Koyama E, Iwamoto M. Mechanisms of synovial joint and articular cartilage formation: Recent  
786 advances, but many lingering mysteries. *Birth Defects Res C Embryo Today*. 2005;75(3):237–248. doi:  
787 10.1002/bdrc.20050.
- 788 [2] Khan IM, Redman SN, Williams R, Dowthwaite GP, Oldfield SF, Archer CW. The Development of Synovial  
789 Joints. In: *Curr Top Dev Biol*. vol. 79. Academic Press; 2007. p. 1–36. doi: 10.1016/S0070-2153(06)79001-9.
- 790 [3] Nowlan NC, Sharpe J, Roddy KA, Prendergast PJ, Murphy P. Mechanobiology of embryonic skeletal de-  
791 velopment: Insights from animal models. *Birth Defects Res C Embryo Today*. 2010;90(3):203–213. doi:  
792 10.1002/bdrc.20184.
- 793 [4] Nowlan NC, Sharpe J. Joint shape morphogenesis precedes cavitation of the developing hip joint. *J Anat*.  
794 2014;224(4):482–489. doi: 10.1111/joa.12143.
- 795 [5] Shea CA, Rolfe RA, Murphy P. The importance of foetal movement for co-ordinated cartilage and bone de-  
796 velopment in utero: Clinical consequences and potential for therapy. *Bone Joint Res*. 2015;4(7):105–116. doi:  
797 10.1302/2046-3758.47.2000387.
- 798 [6] Mikic B, Wong M, Chiquet M, Hunziker EB. Mechanical modulation of tenascin-C and collagen-XII expression  
799 during avian synovial joint formation. *J Orthop Res*. 2000;18(3):406–15. doi: 10.1002/jor.1100180312.
- 800 [7] Osborne AC, Lamb KJ, Lewthwaite JC, Dowthwaite GP, Pitsillides AA. Short-term rigid and flaccid paralyses  
801 diminish growth of embryonic chick limbs and abrogate joint cavity formation but differentially preserve pre-  
802 cavitated joints. *J Musculoskelet Neuronal Interact*. 2002;2(5).
- 803 [8] Roddy KA, Prendergast PJ, Murphy P. Mechanical influences on morphogenesis of the knee joint re-  
804 vealed through morphological, molecular and computational analysis of immobilised embryos. *PLoS ONE*.  
805 2011;6(2):e17526. doi: 10.1371/journal.pone.0017526.
- 806 [9] Pollard AS, Charlton BG, Hutchinson JR, Gustafsson T, McGonnell IM, Timmons JA, et al. Limb proportions  
807 show developmental plasticity in response to embryo movement. *Sci Rep*. 2017;7. doi: 10.1038/srep41926.
- 808 [10] Bridglal DL, Boyle CJ, Rolfe RA, Nowlan NC. Quantifying the tolerance of chick hip joint development to  
809 temporary paralysis and the potential for recovery. *Dev Dyn*. 2021;250(3):450–464. doi: 10.1002/dvdy.236.
- 810 [11] Kahn J, Shwartz Y, Blitz E, Krief S, Sharir A, Breitel DA, et al. Muscle Contraction Is Necessary to Maintain  
811 Joint Progenitor Cell Fate. *Dev Cell*. 2009;16(5):734–743. doi: 10.1016/j.devcel.2009.04.013.
- 812 [12] Nowlan NC, Bourdon C, Dumas G, Tajbakhsh S, Prendergast PJ, Murphy P. Developing bones are  
813 differentially affected by compromised skeletal muscle formation. *Bone*. 2010;46(5):1275–1285. doi:  
814 10.1016/j.bone.2009.11.026.
- 815 [13] Sotiriou V, Rolfe RA, Murphy P, Nowlan NC. Effects of Abnormal Muscle Forces on Prenatal Joint Morphogen-  
816 esis in Mice. *J Orthop Res*. 2019;37(11):2287–2296. doi: 10.1002/jor.24415.

- 817 [14] Brunt LH, Skinner REH, Roddy KA, Araujo NM, Rayfield EJ, Hammond CL. Differential effects of altered  
818 patterns of movement and strain on joint cell behaviour and skeletal morphogenesis. *Osteoarthritis Cartilage*.  
819 2016;24(11):1940–1950. doi: 10.1016/j.joca.2016.06.015.
- 820 [15] Guimond JC, Lévesque M, Michaud PL, Berdugo J, Finnson K, Philip A, et al. BMP-2 functions independently  
821 of SHH signaling and triggers cell condensation and apoptosis in regenerating axolotl limbs. *BMC Dev Biol*.  
822 2010;10:15. doi: 10.1186/1471-213X-10-15.
- 823 [16] Fröbisch NB, Shubin NH. Salamander limb development: Integrating genes, morphology, and fossils. *Dev Dyn*.  
824 2011;240(5):1087–1099. doi: 10.1002/dvdy.22629.
- 825 [17] Cosden-Decker RS, Bickett MM, Lattermann C, MacLeod JN. Structural and functional analysis of intra-  
826 articular interzone tissue in axolotl salamanders. *Osteoarthritis Cartilage*. 2012;20(11):1347–1356. doi:  
827 10.1016/j.joca.2012.07.002.
- 828 [18] Lee J, Gardiner DM. Regeneration of Limb Joints in the Axolotl (*Ambystoma mexicanum*). *PLoS ONE*.  
829 2012;7(11):e50615. doi: 10.1371/journal.pone.0050615.
- 830 [19] Wang JHC, Thampatty BP. An introductory review of cell mechanobiology. *Biomech Model Mechanobiol*.  
831 2006;5(1):1–16. doi: 10.1007/s10237-005-0012-z.
- 832 [20] O’Conor CJ, Case N, Guilak F. Mechanical regulation of chondrogenesis. *Stem Cell Res Ther*. 2013;4(4):61.  
833 doi: 10.1186/scrt211.
- 834 [21] Gilbert SJ, Blain EJ. Cartilage mechanobiology: How chondrocytes respond to mechanical load. In: *Mechano-*  
835 *biology in Health and Disease*. Elsevier Ltd.; 2018. p. 99–126. doi: 10.1016/B978-0-12-812952-4.00004-0.
- 836 [22] Muramatsu S, Wakabayashi M, Ohno T, Amano K, Oishi R, Sugahara T, et al. Functional gene screening  
837 system identified TRPV4 as a regulator of chondrogenic differentiation. *J Biol Chem*. 2007;282(44):32158–  
838 32167. doi: 10.1074/jbc.M706158200.
- 839 [23] O’Conor CJ, Leddy HA, Benefield HC, Liedtke WB, Guilak F. TRPV4-mediated mechanotransduction regulates  
840 the metabolic response of chondrocytes to dynamic loading. *Proc Natl Acad Sci U S A*. 2014;111(4):1316–21.  
841 doi: 10.1073/pnas.1319569111.
- 842 [24] Savadipour A, Nims RJ, Katz DB, Guilak F. Regulation of chondrocyte biosynthetic activity by dy-  
843 namic hydrostatic pressure: the role of TRP channels. *Connect Tissue Res*. 2021;p. 1–13. doi:  
844 10.1080/03008207.2020.1871475.
- 845 [25] Clark AL, Votta BJ, Kumar S, Liedtke W, Guilak F. Chondroprotective role of the osmotically sensitive ion channel  
846 transient receptor potential vanilloid 4: Age- and sex-dependent progression of osteoarthritis in *Trpv4*-deficient  
847 mice. *Arthritis Rheum*. 2010;62(10):2973–2983. doi: 10.1002/art.27624.
- 848 [26] Zelenski NA, Leddy HA, Sanchez-Adams J, Zhang J, Bonaldo P, Liedtke W, et al. Type VI collagen regulates  
849 pericellular matrix properties, chondrocyte swelling, and mechanotransduction in mouse articular cartilage.  
850 *Arthritis Rheum*. 2015;67(5):1286–1294. doi: 10.1002/art.39034.
- 851 [27] Du G, Li L, Zhang X, Liu J, Hao J, Zhu J, et al. Roles of TRPV4 and piezo channels in stretch-evoked Ca<sup>2+</sup>-  
852 response in chondrocytes. *Exp Biol Med*. 2020;245(3):180–189. doi: 10.1177/1535370219892601.
- 853 [28] Fu S, Meng H, Inamdar S, Das B, Gupta H, Wang W, et al. Activation of TRPV4 by mechanical, osmotic or  
854 pharmaceutical stimulation is anti-inflammatory blocking IL-1 $\beta$  mediated articular cartilage matrix destruction.  
855 *Osteoarthritis Cartilage*. 2021;29(1):89–99. doi: 10.1016/j.joca.2020.08.002.
- 856 [29] Servin-Vences MR, Moroni M, Lewin GR, Poole K. Direct measurement of TRPV4 and PIEZO1 activity reveals  
857 multiple mechanotransduction pathways in chondrocytes. *eLife*. 2017;6. doi: 10.7554/eLife.21074.
- 858 [30] Nims RJ, Pferdehirt L, Ho NB, Savadipour A, Lorentz J, Sohi S, et al. A synthetic mechanogenetic gene circuit  
859 for autonomous drug delivery in engineered tissues. *Sci Adv*. 2021;7(5):1–36. doi: 10.1126/sciadv.abd9858.
- 860 [31] Wyczalkowski MA, Chen Z, Filas BA, Varner VD, Taber LA. Computational models for mechanics of morpho-  
861 genesis. *Birth Defects Res C Embryo Today*. 2012;96(2):132–152. doi: 10.1002/bdrc.21013.
- 862 [32] Giorgi M, Verbruggen SW, Lacroix D. In silico bone mechanobiology: modeling a multifaceted biological system.  
863 *Wiley Interdiscip Rev Syst Biol Med*. 2016;8(6):485–505. doi: 10.1002/wsbm.1356.
- 864 [33] Heegaard JH, Beaupré GS, Carter DR. Mechanically modulated cartilage growth may regulate joint surface  
865 morphogenesis. *J Orthop Res*. 1999;17(4):509–517. doi: 10.1002/jor.1100170408.
- 866 [34] Giorgi M, Carriero A, Shefelbine SJ, Nowlan NC. Mechanobiological simulations of prenatal joint morphogen-  
867 esis. *J Biomech*. 2014;47(5):989–995. doi: 10.1016/j.jbiomech.2014.01.002.



- 868 [35] Giorgi M, Carriero A, Shefelbine SJ, Nowlan NC. Effects of normal and abnormal loading conditions on  
869 morphogenesis of the prenatal hip joint: Application to hip dysplasia. *J Biomech.* 2015;48(12):3390–3397.  
870 doi: 10.1016/j.jbiomech.2015.06.002.
- 871 [36] Felipe A, Pinzón C, Márquez K, Kraft RH, Ramtani S, Alexander D, et al. Computational model of a synovial  
872 joint morphogenesis. *Biomech Model Mechanobiol.* 2019;(0123456789). doi: 10.1007/s10237-019-01277-4.
- 873 [37] Parkkinen JJ, Lammi MJ, Helminen HJ, Tammi M. Local stimulation of proteoglycan synthesis in ar-  
874 ticular cartilage explants by dynamic compression in vitro. *J Orthop Res.* 1992;10(5):610–620. doi:  
875 10.1002/jor.1100100503.
- 876 [38] Guilak F, Meyer BC, Ratcliffe A, Mow VC. The effects of matrix compression on proteoglycan metabolism in  
877 articular cartilage explants. *Osteoarthritis Cartilage.* 1994;2(2):91–101. doi: 10.1016/S1063-4584(05)80059-7.
- 878 [39] Kim YJ, Sah RLY, Grodzinsky AJ, Plaas AHK, Sandy JD. Mechanical regulation of cartilage biosynthetic beha-  
879 vior: Physical stimuli. *Arch Biochem Biophys.* 1994;311(1):1–12. doi: 10.1006/abbi.1994.1201.
- 880 [40] Mouw JK, Imler SM, Levenston ME. Ion-channel regulation of chondrocyte matrix synthesis in 3D culture under  
881 static and dynamic compression. *Biomech Model Mechanobiol.* 2007;6(1-2):33–41. doi: 10.1007/s10237-006-  
882 0034-1.
- 883 [41] Jeon JE, Schrobback K, Hutmacher DW, Klein TJ. Dynamic compression improves biosynthesis of hu-  
884 man zonal chondrocytes from osteoarthritis patients. *Osteoarthritis Cartilage.* 2012;20(8):906–915. doi:  
885 10.1016/j.joca.2012.04.019.
- 886 [42] Gordon-Shaag A, Zagotta WN, Gordon SE. Mechanism of Ca<sup>2+</sup>-dependent desensitization in TRP channels.  
887 *Channels.* 2008;2(2):125–129. doi: 10.4161/chan.2.2.6026.
- 888 [43] Jin M, Wu Z, Chen L, Jaimes J, Collins D, Walters ET, et al. Determinants of TRPV4 activity follow-  
889 ing selective activation by small molecule agonist GSK1016790A. *PLoS ONE.* 2011;6(2):e16713. doi:  
890 10.1371/journal.pone.0016713.
- 891 [44] Duerr TJ, Comellas E, Jeon EK, Farkas JE, Joetzler M, Garnier J, et al. 3D Visualization of Macromolecule  
892 Synthesis. *eLife.* 2020;9. doi: 10.7554/elife.60354.
- 893 [45] Nilius B, Voets T. The puzzle of TRPV4 channelopathies. *EMBO Rep.* 2013;14(2):152–63. doi: 10.1038/em-  
894 bor.2012.219.
- 895 [46] Rosenbaum T, Benítez-Angeles M, Sánchez-Hernández R, Morales-Lázaro SL, Hiriart M, Morales-Buenrostro  
896 LE, et al. Trpv4: A physio and pathophysiologically significant ion channel. *Int J Mol Sci.* 2020;21(11). doi:  
897 10.3390/ijms21113837.
- 898 [47] Doube M, Klosowski MM, Arganda-Carreras I, Cordelières FP, Dougherty RP, Jackson JS, et al. BoneJ: Free  
899 and extensible bone image analysis in ImageJ. *Bone.* 2010;47(6):1076–1079. doi: 10.1016/j.bone.2010.08.023.
- 900 [48] Weigert M, Schmidt U, Haase R, Sugawara K, Myers G. Star-convex polyhedra for 3D object detection and  
901 segmentation in microscopy. In: *IEEE WACV; 2020.* p. 3655–3662. doi: 10.1109/WACV45572.2020.9093435.
- 902 [49] Bolte S, Cordelières FP. A guided tour into subcellular colocalization analysis in light microscopy. *J Microsc.*  
903 2006;224(3):213–232. doi: 10.1111/j.1365-2818.2006.01706.x.
- 904 [50] Schindelin J, Arganda-Carreras I, Frise E, Kaynig V, Longair M, Pietzsch T, et al. Fiji: An open-source platform  
905 for biological-image analysis. *Nat Methods.* 2012;9(7):676–682. doi: 10.1038/nmeth.2019.
- 906 [51] von Chamier L, Laine RF, Jukkala J, Spahn C, Krentzel D, Nehme E, et al. Democratising deep learning for  
907 microscopy with ZeroCostDL4Mic. *Nat Commun.* 2021;12(1):1–18. doi: 10.1038/s41467-021-22518-0.
- 908 [52] MATLAB. version 9.7.0.813654 (R2019b). Natick, Massachusetts: The MathWorks Inc.; 2019.
- 909 [53] Shapiro F. *Pediatric Orthopedic Deformities.* vol. 1. Springer International Publishing; 2016. doi: 10.1007/978-  
910 3-319-20529-8.
- 911 [54] Guilak F, Mow VC. The mechanical environment of the chondrocyte: A biphasic finite element model of  
912 cell-matrix interactions in articular cartilage. *J Biomech.* 2000;33(12):1663–1673. doi: 10.1016/S0021-  
913 9290(00)00105-6.
- 914 [55] Kim E, Guilak F, Haider MA. The dynamic mechanical environment of the chondrocyte: A biphasic finite ele-  
915 ment model of cell-matrix interactions under cyclic compressive loading. *J Biomech Eng.* 2008;130(6). doi:  
916 10.1115/1.2978991.
- 917 [56] Lai WM, Hou JS, Mow VC. A triphasic theory for the swelling and deformation behaviors of articular cartilage.  
918 *J Biomech Eng.* 1991;113(3):245–258. doi: 10.1115/1.2894880.

- 919 [57] Wilson W, Van Donkelaar CC, Huyghe JM. A Comparison Between Mechano-Electrochemical and Biphasic  
920 Swelling Theories for Soft Hydrated Tissues. *J Biomech Eng.* 2005;127(1):158. doi: 10.1115/1.1835361.
- 921 [58] Shefelbine SJ, Carter DR. Mechanobiological predictions of growth front morphology in developmental hip  
922 dysplasia. *J Orthop Res.* 2004;22(2):346–352. doi: 10.1016/j.orthres.2003.08.004.
- 923 [59] Arndt D, Bangerth W, Davydov D, Heister T, Heltai L, Kronbichler M, et al. The DEAL.II finite element library:  
924 Design, features, and insights. *Comput Math Appl.* 2020;81:407–422. doi: 10.1016/j.camwa.2020.02.022.
- 925 [60] Comellas E, Budday S, Pelteret JP, Holzapfel GA, Steinmann P. Modeling the porous and viscous re-  
926 sponses of human brain tissue behavior. *Comput Methods Appl Mech Eng.* 2020;369:113128. doi:  
927 10.1016/j.cma.2020.113128.
- 928 [61] Krupkova O, Zvick J, Wuertz-Kozak K. The role of transient receptor potential channels in joint diseases. *Eur*  
929 *Cell Mater.* 2017;34:180–201. doi: 10.22203/eCM.v034a12.
- 930 [62] Lee W, Leddy HA, Chen Y, Lee SH, Zelenski NA, McNulty AL, et al. Synergy between Piezo1 and  
931 Piezo2 channels confers high-strain mechanosensitivity to articular cartilage. *Proc Natl Acad Sci U S A.*  
932 2014;111(47):E5114–E5122. doi: 10.1073/pnas.1414298111.
- 933 [63] Rock MJ, Prenen J, Funari VA, Funari TL, Merriman B, Nelson SF, et al. Gain-of-function mutations in TRPV4  
934 cause autosomal dominant brachyolmia. *Nat Genet.* 2008;40(8):999–1003. doi: 10.1038/ng.166.
- 935 [64] Nishimura G, Lausch E, Savarirayan R, Shiba M, Spranger J, Zabel B, et al. TRPV4-associated skeletal dys-  
936 plasias. *Am J Med Genet C Semin Med Genet.* 2012;160 C(3):190–204. doi: 10.1002/ajmg.c.31335.
- 937 [65] Wallace H, Maden M. The cell cycle during amphibian limb regeneration. *J Cell Sci.* 1976;20(3):539–547. doi:  
938 10.1242/jcs.20.3.539.
- 939 [66] Costa EC, Otsuki L, Albors AR, Tanaka EM, Chara O. Spatiotemporal control of cell cycle acceleration during  
940 axolotl spinal cord regeneration. *eLife.* 2021;10:1–30. doi: 10.7554/eLife.55665.
- 941 [67] Urban JPG, Hall AC. The Effects of Hydrostatic and Osmotic Pressures on Chondrocyte Metabolism. In: *Cell*  
942 *Mechanics and Cellular Engineering.* Springer New York; 1994. p. 398–419. doi: 10.1007/978-1-4613-8425-  
943 0\_22.
- 944 [68] Browning JA, Saunders K, Urban JPG, Wilkins RJ. The influence and interactions of hydrostatic and osmotic  
945 pressures on the intracellular milieu of chondrocytes. *Biorheology.* 2004;41(3-4):299–308.
- 946 [69] Mizuno S, Ogawa R. Using changes in hydrostatic and osmotic pressure to manipulate metabolic function in  
947 chondrocytes. *Am J Physiol Cell Physiol.* 2011;300(6):1234–1245. doi: 10.1152/ajpcell.00309.2010.
- 948 [70] Pattappa G, Zellner J, Johnstone B, Docheva D, Angele P. Cells under pressure - the relationship between  
949 hydrostatic pressure and mesenchymal stem cell chondrogenesis. *Eur Cell Mater.* 2019;37:360–381. doi:  
950 10.22203/eCM.v037a22.
- 951 [71] Comellas E, Carriero A, Giorgi M, Pereira AF, Shefelbine SJ. Modeling the Influence of Mechanics on Biolo-  
952 gical Growth. In: Cerrolaza M, Shefelbine S, Garzón-Alvarado D, editors. *Numerical Methods and Advanced*  
953 *Simulation in Biomechanics and Biological Processes.* 1st ed. Elsevier; 2018. p. 17–35. doi: 10.1016/B978-0-  
954 12-811718-7.00002-2.
- 955 [72] Stringer C, Wang T, Michaelos M, Pachitariu M. Cellpose: a generalist algorithm for cellular segmentation. *Nat*  
956 *Methods.* 2021;18(1):100–106. doi: 10.1038/s41592-020-01018-x.
- 957 [73] Berteau JP, Oyen M, Shefelbine SJ. Permeability and shear modulus of articular cartilage in growing mice.  
958 *Biomech Model Mechanobiol.* 2016;15(1):205–212. doi: 10.1007/s10237-015-0671-3.
- 959 [74] Bennett AF, Garland T, Else PL. Individual correlation of morphology, muscle mechanics, and locomotion in a  
960 salamander. *Am J Physiol Regul Integr Comp Physiol.* 1989;256(6). doi: 10.1152/ajpregu.1989.256.6.r1200.
- 961 [75] Tesařová M, Mancini L, Simon A, Adameyko I, Kaucká M, Elewa A, et al. A quantitative analysis of 3D-cell  
962 distribution in regenerating muscle-skeletal system with synchrotron X-ray computed microtomography. *Sci*  
963 *Rep.* 2018;8(1). doi: 10.1038/s41598-018-32459-2.
